19 **Abstract**

20 Ribosomal genes (rDNAs) are arranged in purely tandem repeats, preventing them from  
21 being reliably assembled onto chromosome. The uncertainty of rDNA genomic structure  
22 presents a significant barrier for studying their function and evolution. Here, we generate  
23 ultra-long Nanopore and short NGS reads to delineate the architecture and variation of the  
24 5S rDNA cluster in the different strains of *C. elegans* and *C. briggsae*. We classify the  
25 individual rDNA units into 25 types based on the unique sequence variations in each unit  
26 of *C. elegans* (N2). We next perform manual assembly of the cluster using the long reads  
27 that carry these units, which led to an assembly of rDNA cluster consisting of up to 167 5S  
28 rDNA units. The ordering and copy number of various rDNA units are indicative of  
29 separation time between strains. Surprisingly, we observed a drastically lower level of  
30 variation in the 5S rDNA cluster in the *C. elegans* CB4856 and *C. briggsae* AF16 strains  
31 than *C. elegans* N2 strain, suggesting a unique mechanism in maintaining the rDNA cluster  
32 stability in the N2. Single-copy transgenes landed into the rDNA cluster shows the  
33 expected expression in the soma, supporting that rDNA genomic environment is  
34 transcriptionally compatible with RNA polymerase II. Delineating the structure and  
35 variation of rDNA cluster paves the way for its functional and evolutionary studies.

36

37

## 38 **Introduction**

39 Ribosomal RNAs (rRNAs) as the components of ribosome play a critical role in protein  
40 synthesis. Eukaryotic rRNAs are encoded by ribosomal DNAs (rDNAs) that are arranged  
41 in tandem within rDNA cluster. There are four rRNA genes, i.e., 5S rRNA, 18S rRNA,  
42 5.8S rRNA, and 28S rRNA. The 5S rDNA cluster is usually arranged as tandem repeats  
43 that are away from the remaining three genes in most species with a few exceptions,  
44 including yeast [1]. The 18S, 5.8S, and 28S rRNAs are produced as a single transcript using  
45 45S rDNA as a template, which is also arranged as tandem array in the genome. The  
46 transcript is processed into three individual ones following transcription [2]. In contrast to  
47 most mRNAs and microRNAs that are produced with RNA polymerase II (Pol II) [3], the  
48 45S rRNAs are transcribed by RNA polymerase I (Pol I), and the 5S rRNAs are transcribed  
49 by RNA polymerase III (Pol III) along with tRNA. Intriguingly, the rRNAs made with  
50 RNA pol II was able to rescue the phenotype of an rDNA deletion mutant in yeast [4],  
51 indicating that rRNAs transcribed by RNA pol II are functional. However, it remains  
52 unclear whether the genomic environment of rDNAs consisting of tandem repeats is  
53 permissive for mRNA transcription.

54 The rDNA copy number is known to be variable between cells, or individuals with different  
55 age [5–7]. The copy number variation (CNV) was found to be coupled with carcinogenesis  
56 [6]. Interestingly, the extrachromosomal rDNA circles derived from chromosomal rDNA  
57 repeats can be reintroduced into the host genome in a dosage-dependent behavior [8],  
58 further complicating the copy number variation. The rDNA CNV between different wild  
59 isolates or mutated strains of *C. elegans* has been estimated with next-generation  
60 sequencing (NGS) reads and quantitative PCR [5,9], ranging from 33 to 245 copies for the

61 45S rDNA and 39 to 438 copies for the 5S rDNA. However, the rDNA CNV during  
62 development has not been reported in *C. elegans* or in other nematodes. In addition to CNV,  
63 sequence variation is also noted in the rDNAs of the same species [10,11].

64 The sequences of rDNA and its non-transcribed sequence (NTS) are found to have  
65 polymorphisms in eukaryotic species, including, single-nucleotide polymorphisms (SNPs)  
66 and small insertion or deletion (INDEL). For example, in the mouse and human, the  
67 INDELs ranging from 1- to 12 bps in rDNA were frequently identified between  
68 chromosomes, tissues, individuals, and families [12,13]. Similar polymorphisms in rDNA  
69 were also identified in yeast [14], fly [15] and plants [16]. Unexpectedly, *C. elegans* carries  
70 only one type of 5S rDNA unit with few SNPs in its coding sequence [10,17], whereas its  
71 related species, *C. briggsae*, carries two distinct types of 5S rDNA units with distinctive  
72 orientation of 5S rDNA relative to splicing leader 1 (SL1) [18,19]. Whether there are any  
73 5S rDNA variants in the NTS region of nematode species has not been thoroughly  
74 investigated.

75 NGS techniques have been intensively used to assemble genome across species in the past  
76 two decades, leading to an exponential increase of genomic data across species. However,  
77 the genome assembly produced with NGS only is usually fragmented due to the presence  
78 of repetitive sequences, especially in those regions consisting of highly tandem repeats  
79 such as centromeres and rDNAs. Therefore, these tandem repeats are commonly included  
80 in various contigs that are unable to be assigned onto precise location of chromosome. The  
81 repetitive sequences create a huge challenge for genome assembly using NGS reads  
82 because of their relatively short read length ranging from 100 to 200 bps. Therefore, extra  
83 efforts have been made to improve the continuity of an assembly, including mate-pair

84 sequencing of the ends from a large genomic fragment [20], incorporation of genetic  
85 markers [21] or chromatin configuration (Hi-C) [22], or using the long reads synthesized  
86 with the NGS short reads [23]. These steps have significantly improved the continuity of  
87 genome assembly, especially for those relatively small genomes. *C. elegans*' isogenic  
88 genome is the first metazoan genome that was assembled using Sanger sequencing reads  
89 coupled with physical mapping, leading to an exceptionally high contiguity [21]. It barely  
90 contains any gaps except in the rDNA clusters and telomere sequences. However, the high  
91 mapping costs prevent its universal application to other species. The genome assembly of  
92 its companion species, *C. briggsae*, was generated using shotgun sequencing coupled with  
93 scaffolding with end sequencing of bacterial artificial chromosome (BAC) and fosmids  
94 [19]. The resulting contigs or supercontigs were assembled onto chromosomes using  
95 genetic markers [24] or synthetic long reads (SLR) coupled with Hi-C [23]. However, these  
96 efforts failed to resolve the localization and genomic organization of rDNA clusters.  
97 Delineation of the genomic architecture and localization of rDNA clusters is needed for  
98 studying the evolution, function, and regulation of ribosomal genes [25–28].

99 Third-generation sequencing (TGS) techniques, including Oxford Nanopore Technologies  
100 (ONT) Nanopore sequencing and PacBio Single Molecule, Real-Time (SMRT) sequencing,  
101 overcome the intrinsic limitation of the short-read by generating ultra-long reads with  
102 limited sequencing bias [29], which is expected to facilitate genome assembly with an  
103 improved continuity by the inclusion of more repetitive sequences [30–32]. Importantly,  
104 the amplification-free TGS enables researchers to directly sequence DNA or RNA with a  
105 reduced sequence bias [33]. Due to its ultra-long length, TGS has recently been used to re-  
106 sequence *C. elegans* genome, which recovered substantially more repetitive sequences and

107 revealed chromosomal rearrangements and structural variations between strains [30–32].  
108 However, these assemblies were not able to resolve the genomic structure of 5S rDNA and  
109 45S rDNA cluster.

110 Here, we characterized the genomic architecture of the 5S rDNA cluster in both *C. elegans*  
111 and *C. briggsae* using both ONT sequencing and NGS reads. Aided by the reads, we  
112 identified various reproducible sequence variations in the 5S rDNA unit in both species,  
113 which allowed us to generate an assembly of 5S rDNA cluster carrying up to at least 167  
114 repetitive units. The ONT reads also permitted the determination of genomic localization  
115 of rDNAs in *C. briggsae*. We observed strain-specific composition and CNV of the 5S  
116 rDNA units that are indicative of separation time among *C. elegans* strains. Our functional  
117 characterization of the rDNA cluster indicates the genomic environment of rDNA cluster  
118 is transcriptionally compatible for RNA polymerase II at least in the somatic tissues. Our  
119 structural and functional characterization of the rDNA clusters lays a foundation for further  
120 characterization of the rDNA function, regulation and evolution.

## 121 **Results**

### 122 **Genomic architecture of the 5S rDNA cluster**

123 To gain an initial idea of the genomic architecture of rDNA cluster, starting from the  
124 existing *C. elegans* N2 genome assembly WBcel235 [21], we focused on the 5S rDNA  
125 cluster on the chromosome V for manual finishing due to its relatively short size and the  
126 well-characterized boundary sequences (Fig. S1). We generated ~1.8 million ONT DNA  
127 reads with an N50 from 18 to 31 Kbp from three developmental stages of *C. elegans* N2,  
128 i.e. embryo (EMB), L1 larvae (L1), and young adult (YA) stages (Table 1), which were  
129 mapped against the reference genome WBcel235 [34]. As expected, the mapping results

130 showed a drastic increase in read coverage of 5S rDNA compared with its flanking  
131 sequences (Fig. S2a). The flanking sequences of the 5S rDNA cluster were identified using  
132 the ONT reads that spanned the rDNA repeats and the unique sequences on both sides of  
133 the cluster (Fig. 1c). Given that the genomic structure of rDNA cluster has not been  
134 resolved in any species due to its extremely repetitive characteristics, we set out to  
135 investigate whether there are any sequence variants in the rDNA units that could be  
136 harnessed to assemble the entire cluster by sequencing of three developmental stages of *C.*  
137 *elegans* (Table 2). Unexpectedly, we not only confirmed the presence of the canonical 5S  
138 rDNA unit (referred to as unit 1.1 hereafter) in *C. elegans*, but also identified numerous  
139 novel variants of the 5S rDNA unit that are reproducibly arranged relative to one another  
140 in the ONT reads. We chose a subset of the variants of 5S rDNA unit to facilitate our  
141 assembly of 5S rDNA cluster (Fig. 1a, b, and Table 2). We classified the rDNA units into  
142 three major categories, i.e., 1-3, by the presence or absence of two unique deletions, i.e.,  
143 99\_102del, 780\_809del, representing a deletion of 4 and 30 bps, respectively, from the  
144 indicated positions relative to the canonical 5S rDNA unit 1.1. Each category of unit was  
145 further classified into different types based on other sequence variations, mostly SNPs, on  
146 top of the two deletions established with the existing NGS reads (Table 2). The relative  
147 proportion of each 5S rDNA variant with unique SNP/INDEL was confirmed with the NGS  
148 reads [35] (Fig. 1b).

149 The genomic organization of rDNA units was resolved through tiling of ONT reads from  
150 both orientations by taking advantage of different combinations of rDNA unit variants and  
151 other types of repeats present in the rDNA cluster (Fig. 1a-c, Fig. S1, Table 2, and Table  
152 S1). Consequently, we were able to generate a contig that carries a total of at least 167

153 copies of 5S rDNA units (Fig. 1d), including at least 47 copies of canonical rDNA unit  
154 (unit 1.1), 15, 90 and 11 copies of unit 1, 2 and 3 variants, respectively, and 4 copies of  
155 existing 5S rDNA unit. In addition, there are 3 copies of existing non-rDNA repeat  
156 (referred to as Repeat 1a, 1b, and 2) (Table S2) in the cluster. The rDNA cluster were  
157 divided into five regions (R1-5) based on the number and composition of the 5S rDNA  
158 units. The results show that 5S rDNA cluster consists of various unit variants arranged in  
159 reproducible order in our N2 strain. Availability of the detailed structure of 5S rDNA  
160 cluster is expected to facilitate functional and evolutionary analysis of rDNAs.

### 161 **Structural variations of 5S rDNA cluster between our N2 and its derived *C. elegans*** 162 **strains**

163 Given that the relatively stable number and genomic organization of 5S rDNA variants in  
164 the ONT reads derived from our *C. elegans* N2, we wondered to what extent the  
165 arrangement and copy number of the rDNA units are conserved between our N2 and other  
166 N2-derived strains that had been separated from one another for different times. To this  
167 end, we generated ~0.9 and ~2.7 million ONT reads for two transgenic strains (ZZY0600  
168 and ZZY0603), each carrying a single copy of transgene associated with 5S rDNA  
169 sequences (Fig. 2a, b) generated using *miniMos* technique [36] in the background of *unc-*  
170 *19* mutant allele *tm4063* [37]. Reads with transgene sequences helped us elongate the  
171 assembly of 5S rDNA cluster but still failed to span the entire cluster region. Three rDNA  
172 structural variations were found between the 5S rDNA clusters of our N2 and two  
173 transgenic strains (Fig. 2c-e). In addition to our sequenced data from N2 and the transgenic  
174 strains, we also used existing ONT reads generated from other N2-derived strains [30,31]  
175 to further evaluate the variation in the 5S rDNA clusters because the two N2 strains were



176 separated from each other and individually maintained for at least 10 years. Intriguingly,  
177 we observed variations across Region 1-4. Extent of variation is indicative of separation  
178 time between each other, i.e., the longer time the two strains are separated between each  
179 other, the more variations are found between the structures of their 5S rDNA clusters. For  
180 example, a fragment consisting of one copy of unit 3 and two copies of unit 1 is missing in  
181 the Region 3 of our N2 relative to all the remaining strains (Fig. 2d). More variations in  
182 the copy number of *C. elegans* 5S unit (*cel*-5S unit) 1 were observed in the Region 4 (Fig.  
183 2e). Our N2 contains 30 copies of rDNA unit, whereas the two transgenic strains derived  
184 from the same starting strain have 32 copies, and the strain VC2010 and its recent  
185 derivative PD1074 both carry 35 copies. However, the VC2010 [31] gains an extra four  
186 copies of unit 2 after its separation from its derived strain PD1074 (Fig. 2f) [30]. This  
187 apparent association of rDNA type and/or exact copy number with separation time raises  
188 the possibility of using the variation in barcoding the strains that are freshly separated from  
189 one another (Fig. 2g).

190 **Largely uniform composition of 5S rDNA unit in the 5S rDNA cluster of *C. elegans***  
191 **Hawaii strain and *C. briggsae* wild isolate AF16**

192 To further examine the structural variations in rDNA cluster between N2 and more  
193 distantly related *C. elegans* strains, we focused on the comparison between N2 and CB4856,  
194 a Hawaiian strain of *C. elegans* that is one of the most divergent from the strain N2 [38].  
195 To this end, we generated ~2.3 million ONT reads using CB4856 animals (Table 1), which  
196 were used to assemble the 5S rDNA cluster of CB4856 in a way similar to that used for the  
197 N2 (Fig. 3). Surprisingly, we found that the canonical *C. elegans* 5S rDNA unit, i.e., *cel*-  
198 5S unit 1.1, one of the most predominant forms in N2, and *cel*-5S unit 3 were absent in the

199 CB4856 genome using a combination of existing NGS reads with our ONT reads for  
200 CB4856 (Fig. 3a-e, Table 1, and Table S3). Remarkably, the occurrences of SNP and  
201 INDEL identified in 5S rDNA unit are much lower in the CB4856 than in the N2 strain  
202 (Fig. 3a-b). All the units in CB4856 belong to the category 2 due to the presence of a 4 bp-  
203 deletion (Fig. 3a and Table 2). They can be further divided into six subtypes versus the 13  
204 in the N2 (Table 2 and Table S3). Only two subtypes out of the six, i.e., unit 2.1 and 2.6,  
205 are shared between the two strains. Notably, the entire 5S rDNA cluster is dominated by  
206 two rDNA subtypes, i.e., units 2.14 and 2.15, with the former as the predominant member  
207 (Fig. 3c-d). The presence of relatively uniform rDNA units in CB4856 is in sharp contrast  
208 to the mosaic compositions of rDNA units in the N2 (Fig. 3c). The *cel-5S* unit variants 2.14  
209 and 2.17 were interrupted by the Repeat 1a and 2 at the identical unit position (947-953 bp)  
210 in CB4856 (Fig. 3d), raising the possibility of their common origin. Given the presence of  
211 *cel-5S* unit 3 in N2 but not in CB4856 that carries a 30 bp deletion (Fig. 1-3, Table 2, and  
212 Table S3), we evaluated the distribution dynamics of the deletion using the existing NGS  
213 data from 330 *C. elegans* wild-isolates [35]. The result confirmed the presence of the unit  
214 3 in N2 and other 163 its related strains but not in the remaining strains, including CB4856  
215 (Fig. 3e, Fig. S3, Table S4). It also showed that this unique deletion had undergone multiple  
216 times of gain or loss between strains, suggesting a high turnover rate of 5S rDNA variation.

217 To further examine to what extent the structure of the 5S rDNA cluster is conserved  
218 between species, we generated ~1.4 million of ONT reads (approximately 91× coverage)  
219 from *C. briggsae* AF16 young adults with an N50 of ~15.4 kb and ~39 million of paired  
220 end NGS reads of 150 bps in length from mix-staged *C. briggsae* animals. To locate the  
221 flanking sequences of 5S rDNA cluster in the *C. briggsae* genome, we combined the ONT

222 reads with the previous SLR reads [23] to generate an AF16 genome assembly using  
223 Miniasm [39], followed by polishing with Racon [40]. After removal of bacterial genome  
224 and duplicated contigs, this draft assembly contains 20 contigs with summed size of  
225 approximately 104 Mbp (Fig. 4a). The contigs were ordered and oriented relative to one  
226 another with the reference to CB4 [24] (Fig. 4b). Evaluation using BUSCO [41] revealed  
227 the completeness of this genome assembly was comparable to that of the *C. elegans* N2  
228 genome (Fig. 4c). The *C. briggsae* genome was known to contain two divergent 5S rDNA  
229 units with an opposite orientation of SL1 relative to 5S rDNA coding sequence. They were  
230 referred to as *cbr*-5S unit 1.1 and 2.1, respectively (Fig. 5a-c), which were previously  
231 placed onto two separate locations on chromosome [28] (Fig. 5d). With two SNPs in *C.*  
232 *briggsae* 5S unit (*cbr*-5S unit) 1.1 (195G>T and 674G>T) and one deletion identified in  
233 the NGS data relative to *cbr*-5S unit 1.1 and 2.1 (382\_440del), respectively (Table S5), we  
234 classified the *C. briggsae* 5S units into six types, i.e., unit 1.1-1.4 and unit 2.1-2.2, and  
235 generated the 5S rDNA cluster assembly in *C. briggsae* (AF16) in a way similar to that we  
236 did in *C. elegans*. Our new genome assembly and Hi-C data [28] supported that all the six  
237 divergent 5S rDNA units were located within a single location in the *C. briggsae* genome  
238 (Fig. 5e and Fig. S4b). The results also showed that *C. briggsae* 5S rDNA cluster mainly  
239 consisted of four types of units, i.e., 1.1, 1.2, 1.4 and 2.1 (Fig. 5e). In summary, although the  
240 variations in sequence and copy number of 5S rDNA unit are quite common in *C. elegans*  
241 N2 and its derived strains, the 5S rDNA unit is largely uniform in *C. elegans* Hawaii strain  
242 (CB4856) and *C. briggsae* wild isolate (AF16), suggesting that the N2 is unique in  
243 maintaining the stability of its 5S rDNA cluster.

244 **Transposition of chromosome I end associated with 45S (18S-5.8S-26S) rDNA cluster**  
245 **in *C. elegans* genome**

246 Unlike in yeast, the locus of 5S rDNA cluster is separated from that of the 18S-5.8S-26/28S  
247 rDNA cluster in nematode [2,17], fly [42], mouse and human [43]. The 45S rDNA unit  
248 consists of an 18S, a 5.8S and a 26S rRNA gene interrupted by two internal transcribed  
249 spacers (ITS1 and ITS2) in both *C. elegans* and *C. briggsae*. The *C. briggsae* 45S rDNA  
250 unit is roughly 300 bp longer than that of *C. elegans*, which was mainly contributed by the  
251 external transcribed sequence (ETS) (Fig. 6a-c). The *C. elegans* 45S rDNA cluster is  
252 located at the right end of chromosome I. The ONT reads from all *C. elegans* N2-derived  
253 strains confirmed that the sequence between the 45S rDNA cluster and the telomeric  
254 sequences is partial ETS (Fig. 6d). Based the NGS reads of N2 genomic DNAs [35], most  
255 of the called variants using ONT reads (Fig. S5 and Table S6) resulted from INDELs in  
256 the homopolymer regions, in which ONT read sequence were known to be less accurate  
257 than in other regions, leading to our attempt to identify possible sequence variation within  
258 the cluster was not successful. In addition, all our ONT reads carrying either the left or  
259 right flanking sequences contain only partial 45S rDNA unit. This was mostly due to the  
260 relatively large size of the unit (~7.2 kb in *C. elegans* and ~7.5 kb in *C. briggsae*) and a  
261 relatively shorter 45S rDNA sequence-containing reads compared to other genomic  
262 positions (Fig. S6). Therefore, we were unable to identify any unique sequence in the  
263 cluster as an anchor to extend ONT reads deeper into the cluster from both boundaries.  
264 Although we are not certain whether there were any structural variations within the *C.*  
265 *elegans* 45S rDNA cluster, these ONT reads can be used to correct the boundary sequences  
266 of 45S rDNA cluster in *C. elegans* N2 and CB4856 strains (Fig. 6d). We observed a

267 dramatic rearrangement event in the right boundary of CB4856 chromosome I relative to  
268 that of N2. For example, we identified an apparent transposition of the left end of  
269 chromosome IV to the right end of chromosome I (Fig. S7), which is consistent with a  
270 previous finding [32]. The transposed fragment underwent an uninterrupted duplication  
271 and transposition to the left end of the chromosome I along with its flanking rDNA  
272 sequences. A tandem array consisting of positioning sequence on X (pSX1) [44] was also  
273 found adjacent to the transposition site, but its origin was unclear.

274 In the *C. briggsae* genome assembly CB4 [24], the 45S rDNA-containing sequences were  
275 fragmented in various contigs with unknown chromosome linkage (Fig. 6e and Fig. S2d).  
276 The Hi-C data [28] and our ONT reads supported a single location of the 45S rDNA cluster  
277 at the left end of the chromosome V (Fig. 6e and Fig. S4b). We further evaluated the  
278 validity of the estimated copy number of 45S rDNA unit by mapping of our ONT reads  
279 against the 45S rDNA cluster consensus sequences incorporated into our newly generated  
280 *C. briggsae* genome. The changes in reads coverage were consistent with the estimation of  
281 45S rDNA copy number (Fig. S2d).

## 282 **The genomic environment of rDNA cluster is compatible with RNA Pol II** 283 **transcriptionally**

284 Eukaryotic cells use at least three RNA polymerases, i.e., RNA polymerase I (Pol I), Pol  
285 II, and Pol III, which produce 18S/5.8S/26(28)S rRNA, mRNA, and 5S rRNA, respectively.  
286 Given that all the rDNAs transcribed by the RNA Pol I and III are localized at two distinct  
287 loci consisting of rDNA and some other repetitive sequences only but depleted of any  
288 protein-coding sequences in both *C. elegans* and *C. briggsae* genomes, and yeast mutant  
289 lacking rDNA locus can be rescued by forced expression of rRNAs by RNA polymerase

290 [45], we wondered whether the two rDNA clusters are permissive to RNA Pol II  
291 transcriptionally. To this end, we generated multiple transgenic lines carrying a single copy  
292 of insertion within or outside the rDNA cluster expressing a fluorescence marker using  
293 *unc-119* mutant [37]. In the transgenic animals, a complete rescue of uncoordinated (Unc)  
294 phenotype along with an apparent expression of the reporter in various parts of the soma  
295 indicates the native rDNA cluster regions are transcriptionally compatible with Pol II in  
296 the somatic tissues (Fig. S8). However, despite the expression of the reporter in soma,  
297 germline, and early embryo when it was inserted outside of the rDNA cluster, the  
298 expression in germline and early embryo was absent for the same reporter inserted within  
299 the rDNA cluster, suggesting that the genomic environment of rDNA cluster may not be  
300 accommodative to the expression in germline and early embryo.

301

## 302 **Discussion**

303 Rapid development in sequencing technologies that can produce ultra-long reads makes it  
304 possible for resolving the structures of complex genome regions, including those consisting  
305 of tandem repetitive sequences. These sequences represent the “dark matter” of the existing  
306 genomes, including human genome [46]. One of the key advantages of the long reads is  
307 their ability to span repetitive sequences, allowing *de novo* assembling of the repetitive  
308 region or scaffolding of the existing contigs generated from NGS reads. Aided by the long  
309 reads, resolving the structure of highly repetitive regions, including rDNA cluster,  
310 centromere, telomere, or chromosomal rearrangement, becomes within reach. Our analyses  
311 of rDNA cluster structures using ONT long reads in both *C. elegans* and *C. briggsae*

312 provide insights into the intra- or inter-species dynamics of rDNA clusters, which  
313 demonstrate an unusually high rate of structural and sequence variations inside the 5S  
314 rDNA cluster in the *C. elegans* N2 strain compared with its distantly related *C. elegans*  
315 CB4856 strain and the *C. briggsae* AF16 strain. The results suggest that *C. elegans* N2  
316 strain may be at a disadvantage in maintaining the structure and stability of its rDNA cluster  
317 relative to other strains or *Caenorhabditis* species. This may have complications in its  
318 fitness, which warrants further investigation.

### 319 **The power of ONT read in resolving tandem repeats**

320 Repetitive sequences especially those tandem repetitive ones are problematic for genome  
321 assembly. The *C. elegans* genome has been claimed as a “finished” genome with no gap  
322 due to its homozygosity and relatively small size [21]. However, the annotation of its  
323 genomic regions involving rDNA sequences is far from completion. For example, except  
324 for the boundary sequences, the previous sequencing methods failed to establish the  
325 genomic arrangement of the rDNA units and their variations [21,30,31]. Meanwhile, the  
326 existing *C. briggsae* genome assembly is far more fragmented than the *C. elegans* one.  
327 Despite various efforts have been made to improve the genome assembly of *C. briggsae*  
328 [19,23,24,47,48], none of them has been able to reliably resolve the structure and genomic  
329 localization of rDNA cluster. Aided by the ONT reads of high coverage, the genomic  
330 localization was readily resolved for both 5S rDNA and 45S rDNA clusters in *C. briggsae*  
331 (Fig. 5e and Fig. 6e). Our method of using Nanopore sequencing in resolving complex  
332 genomic structures and repetitive regions is readily applicable to rDNA cluster in other  
333 species. Consistent with this, taking advantage of ONT reads, the entire human X and Y

334 chromosomes were assembled from telomere to telomere using genomic DNAs of an  
335 isogenic cell line [49,50].

336 Most nematode genomes were assembled as contigs using shotgun sequencing method  
337 with NGS reads [51], which is also the case for many other species, leading to the absence  
338 of genomic parts consisting of tandem repetitive sequences. Given the decreasing sequence  
339 costs of ONT reads, it is feasible to re-sequence or improve numerous existing genomes  
340 especially for those of human and model organisms as well as economically significant  
341 species using the reads produced by ONT or other sequencing platforms such as PacBio  
342 High-Fidelity (HiFi). Given a relatively lower read accuracy of ONT reads than NGS reads,  
343 it would be ideal to simultaneously generate new or use the existing NGS reads to correct  
344 the nucleotides of a *de novo* genome assembly generated with ONT reads only. This would  
345 give rise to a highly accurate genome in terms of nucleotide and chromosome continuity.  
346 Given that most of the existing genomes were generated using NGS reads, leading to a  
347 fragmented assembly because of the presence of highly repetitive sequences, the TGS is  
348 expected to play a significant role in genome finishing or improvement in the years to  
349 come.

350 **Failure of recovering any ONT read that spans the entire 5S rDNA cluster suggests**  
351 **its complex structure**

352 Given the ONT read length up to 196 Kbps (Table 1), the estimated copy number (Table  
353 S7), and relatively small size of the 5S rDNA unit, we reasoned that there were at least  
354 some ONT reads that were able to span the entire region from the left boundary of the 5S  
355 rDNA cluster to the “anchoring” sequence, i.e., the unique variants of 5S rDNA unit or the  
356 transgenes landed inside the cluster (Fig. 2a, b). However, we failed to recover any such



357 ONT reads, suggesting that there could be some complex structural barriers that prevented  
358 the extension of DNA strand during Nanopore sequencing. Consistent with this, we  
359 observed a relatively smaller average read length of ONT reads associated with rDNAs  
360 than those independent of rDNAs (Fig. S6). For example, in the strain ZZY0603, which  
361 carries a transgene inside the 5S rDNA cluster (Fig. 2b), the ONT reads associated with  
362 the transgene contained up to 52 copies of canonical 5S rDNA unit on the left side of the  
363 transgene. However, no read was found to span the entire region from the left boundary of  
364 rDNA cluster to the transgene. This was unexpected because the entire unresolved part  
365 within the R1 region was estimated to carry a total of 34-60 copies of 5S rDNA unit with  
366 31 copies located on the right side of transgene (Fig. 2b). Similarly, in the ONT reads of  
367 ZZY0600, which carried a transgene next to the sixth copy of the 5S rDNA unit away from  
368 the left boundary of the 5S rDNA cluster, the ONT reads associated with the transgene  
369 carried a maximum of 44 copies of 5S rDNA unit on the right of the transgene (Fig. 2b).  
370 Again, no read was found to span the entire region from the anchoring 5S rDNA variant  
371 (unit 1.6) to the transgene. Hence, we postulate that rDNAs in this region may undergo  
372 active DNA replication or amplification, which prevented sampling of longer DNA  
373 fragment for sequencing. For example, at replication fork, the rDNAs undergoing active  
374 replication are single-stranded [8], which would be vulnerable to DNA shearing during  
375 DNA extraction. Consequently, the ongoing replication in rDNA may hinder the extension  
376 of the ONT reads, which led to the absence of the long reads spanning the entire active  
377 region. Alternatively, the failure of ONT read to span the entire region was likely caused  
378 by a complex tertiary structure of the highly repetitive DNA sequences, which might be

379 difficult to be opened up by the helicase during Nanopore sequencing and blocked the  
380 sequencing pore, leading to early termination of ONT sequencing process.

381 **Uncoupled 5S rDNA and 45S rDNA copy number between developmental stages at**  
382 **organism level**

383 The copy numbers among the 5S, 5.8S, and 28S rRNA genes, which encode rRNAs that  
384 constitute the ribosomal large subunit, were thought to be highly correlated [52,53]. Given  
385 the differential transcriptional efficiencies between cell types and the storage of 5S rRNA  
386 in ribosome-free particles [54], the copy numbers of rRNA genes may not necessarily show  
387 concerted change at organism level although they could be coupled in a particular cell type.  
388 For example, the estimated copy numbers between 5S rDNA and 45S rDNA appeared to  
389 be uncoupled (Table S8). Copy number of the 5S rDNA unit increased from 116, 169, to  
390 184 from EMB, L1, and YA stage, whereas the copy number of 45S rDNA unit reached  
391 the highest level at L1 stage (114 copy) compared with 98 and 103 copies at EMB and YA  
392 stages, respectively. Although this result is consistent with a previous finding with mutated  
393 *C. elegans* NGS data [5], it is inconsistent with the data from human and mouse [52],  
394 suggesting differential regulations of the overall dosage of 5S and 45S rDNAs between  
395 nematodes and mammals.

396 Availability of ultra-long reads from ONT or PacBio platforms is expected to accelerate  
397 the generation of complete genome sequence from telomere to telomere. With these  
398 technologies, the human chromosome 8, X, and Y were assembled with no gap albeit with  
399 some manual corrections [55–57]. With ultra-long reads of a higher read accuracy, the  
400 structure of 45S rDNA and other highly repetitive regions such as centromeres and

401 telomeres are expected to be resolved in the coming years, leading to a gap-free genome,  
402 in human, model organisms and economically significant species in the years to come.

403

## 404 **Methods**

### 405 **Sequencing library preparation and ONT sequencing**

406 For *C. elegans* wild isolates, genomic DNAs were extracted from the mix-staged embryos  
407 (EMB), early-stage larvae (L1) and young adults (YA) of N2 strain (shipped from  
408 Waterston laboratory, Seattle, WA, USA in 2010) or from the mix-staged animals of  
409 CB4856 strain. For *C. elegans* transgenic strains, genomic DNAs were extracted from the  
410 homozygous mix-staged animals with the following genotypes: ZZY0600 (*unc-*  
411 *119(tm4063)* III; *Is[sel-8p::HIS-24::GFP::pie-1 3' UTR, unc-119(+)]* V), ZZY0603 (*unc-*  
412 *119(tm4063)* III; *Is[dsl-1p::HIS-24::GFP::pie-1 3' UTR, unc-119(+)]* V), and ZZY0653  
413 (*unc-119(tm4063)* III; *Is[his-72p::mCherry::HIS-24::pie-1 3' UTR, unc-119(+)]* I), each  
414 carrying a single-copy of transgene in rDNA cluster. For *C. briggsae* wild isolate, genomic  
415 DNAs were extracted from AF16 young adults. Animal synchronization was performed as  
416 described [58]. Before harvesting, the *C. elegans* and *C. briggsae* animals were maintained  
417 on plates of 1.5% nematode growth medium (NGM) seeded with *E. coli* OP50 at room  
418 temperature and in a 25°C incubator, respectively. Genomic DNAs were extracted from  
419 animals with PureLink Genomic DNA Mini Kit (Invitrogen) using siliconized tubes and  
420 pipette tips to minimize shearing. 4 µg purified DNAs from each sample were used for  
421 library preparation using Genomic DNA by Ligation Kits SQK-LSK108 (Oxford  
422 Nanopore Technologies) for N2 and ZZY0653, and Ligation Kits SQK-LSK109 (Oxford  
423 Nanopore Technologies) for the remaining strains. Sequencing was performed on GridION

424 X5 or MinION with R9.4.1 flow cell (FLO-106, Oxford Nanopore Technologies) using  
425 default parameters.

#### 426 **Sequence acquisition and alignment**

427 Base-calls were performed using Guppy (v3.1.5, Oxford Nanopore Technologies) using  
428 the high-accuracy configuration (HAC) model. All the base-called reads from each library  
429 were pooled for analysis of read length distribution with SeqKit (v0.10.2) [59]. The reads  
430 were aligned against the *C. elegans* N2 genome assembly (WormBase WBcel235) [34] or  
431 the *C. briggsae* AF16 genome assembly (CB4) [24] with Minimap2 (v2.17) [60] using  
432 default parameters for ONT reads. Read average coverage was calculated from the BAM  
433 file using SAMtools depth [61]. The ONT reads of *C. elegans* VC2010, a wild-type strain  
434 derived from N2, were downloaded from European Nucleotide Archive (ENA) with  
435 accession numbers PRJEB22098 [31]. The ONT and PacBio reads from *C. elegans* strain  
436 PD1074, a wild type strain derived from VC2010, were downloaded from Sequence Read  
437 Archive (SRA) database with accession number SRR7594463 and SRR7594465,  
438 respectively [30]. The ONT reads of VC2010 and PD1074 were used for identifying lab-  
439 specific variations in the rDNA unit and its genomic organization. The PacBio reads of *C.*  
440 *elegans* CB4856 were downloaded from the SRA database with accession number  
441 SRR8599837 [32].

442 For short NGS reads of *C. elegans* N2 and CB4856, the alignment BAM files were  
443 downloaded from *Caenorhabditis elegans* Natural Diversity Resource (CeNDR) project  
444 [35]. Short NGS reads were aligned to WBcel235 using BWA (v0.7.17) [62] with default  
445 parameters. The *C. briggsae* SLR reads and Hi-C reads were downloaded from the SRA  
446 database with accession number SRR6384296 and SRR6384332, respectively [23,48].

#### 447 **Identification of variation in 5S rDNA units**

448 *C. elegans* ONT reads with rDNA sequences were aligned against one copy of *cel-5S* unit  
449 1.1 with Minimap2. From the CIGAR strings in the generated SAM file, to minimize the  
450 INDELS resulted from base-calling errors from homopolymers and simple repeats, only  
451 the INDELS longer than 3 bp were kept for copy counting with custom scripts. After  
452 normalization with genome-wide read coverage, the normalized INDEL count higher than  
453 one copy was considered as a potential new INDEL variant. Using the strain-specific BAM  
454 files generated with NGS read alignment against the N2 reference genome produced  
455 previously [35], *C. elegans* N2 and CB4856 NGS reads mapped to the 5S rDNA region  
456 were separately extracted and then individually mapped to a single *cel-5S* unit 1.1 in the  
457 same way as that for the ONT reads. SNP calling was performed with BCFtools [63] using  
458 the NGS reads stated above. The presence of *cel-5S* unit 2 was established by a 4-bp  
459 deletion relative to the *cel-5S* unit 1.1. The *cel-5S* unit 3 was established by the presence  
460 of a 30-bp deletion in the NGS and ONT reads relative to the *cel-5S* unit 1.1 in N2 strain.  
461 This deletion was absent in the NGS and ONT reads of CB4856.

462 To investigate whether the 30-bp deletion in the *cel-5S* unit 3 are present in all *C. elegans*  
463 wild-isolates, the NGS reads derived from 330 whole-genome shotgun libraries [35] were  
464 mapped against the sequences of *cel-5S* unit 1 and 3 using BWA. The reads that were  
465 uniquely mapped to the deletion junction for at least 12 bps at both flanking sides were  
466 extracted with SAMtools with parameters -q 30 -F 4. A strain was defined as *cel-5S* unit  
467 3-containing if over 1% of total reads carried the deletion regardless of the total number of  
468 supporting reads, or if over 0.1% of total reads carried the deletion but with at least 10  
469 supporting reads. The phylogenetic tree of the 330 strains produced previously [35] was

470 visualized in R with ggplot2 and ggtree packages [64–66]. The variants of *C. briggsae* 5S  
471 rDNA units were identified similarly as in *C. elegans*.

#### 472 **Reconstruction of rDNA clusters**

473 Reconstruction of the *C. elegans* 5S rDNA cluster started with identifying all the ONT  
474 reads carrying the flanking sequences of the cluster, i.e. the *ZK218.23* as the left boundary,  
475 and the sequences from chrV: 17,133,740-17,137,381 (*WBcel235*) as the right boundary.  
476 These reads were iteratively extended into the cluster by performing SNP- and INDEL-  
477 based manual assembly through chromosome walking. Based on the pairwise alignment  
478 results using BLASTN [67], the consensus of rDNA cluster was generated using at least  
479 10 supporting reads that contained the sequences of rDNA variants or other repeats as  
480 anchors from both DNA strands (Fig. S1). This step was reiterated till the exhaustion of all  
481 available ONT reads. To determine the potential structural variations among *C. elegans*  
482 N2-derived strains and between *C. elegans* strains, each 5S rDNA cluster was similarly  
483 assembled with strain-specific ONT reads. For assembly of 45S rDNA cluster in *C. elegans*  
484 N2, the right boundary was determined using the ONT reads containing both ETS and  
485 telomeric sequences (TTAGGC). For *C. elegans* CB4856 45S rDNA cluster, the right  
486 boundary was determined using the ONT reads containing telomeric sequences.

487 Reconstruction of the *C. briggsae* 5S rDNA cluster was started with two chromosome III  
488 contigs carrying a 5S rDNA sequence and genes next to rDNA sequences (*CBG06809* and  
489 *CBG10685*). The right boundary of 45S rDNA cluster was determined with the ONT reads  
490 carrying the rDNA sequence and those from its right boundary in CB4, which is located at  
491 the beginning of chromosome V. The 45S cluster left boundary was determined with the  
492 ONT reads carrying both 45S rDNA and telomere sequences.

### 493 **Draft genome assembly and quality assessment**

494 To get a better reference genome for locating *C. briggsae* rDNA clusters, an AF16 draft  
495 genome was *de novo* assembled with ONT reads. Miniasm (v0.3) was run with AF16  
496 young adult ONT reads. The generated contigs were polished with Racon (v1.4.10) [40]  
497 using two rounds of ONT reads and three rounds of SLR reads [23]. Bacterial genomes  
498 were manually excluded from the polished contigs. Remaining 21 contigs were scaffolded  
499 into chromosome level using CB4 as reference and interspaced with 1000 Ns. The final  
500 draft genome was aligned against CB4 using LAST (v1021) [68]. The completeness of the  
501 resulting AF16 draft genome assembly, CB4, and *C. elegans* N2 genome assembly  
502 WBcel235 was assessed in parallel using BUSCO (v4.0.2) [41] with nematoda\_odb10  
503 database.

### 504 **Estimation of rDNA copy number**

505 For estimation of copy number of the *C. elegans* 5S rDNA units, ONT reads mapped to the  
506 region of the chrV: 17,110,000-17,430,000 (WBcel235) were extracted with SAMtools and  
507 were used for statistical analysis with SeqKit. The extracted reads were aligned against the  
508 5S rRNA-coding sequence with BLASTN with option “-word\_size 7”. Sequences with  
509 alignment length > 17 bps were kept for the downstream analysis. The copy number of the  
510 5S rDNA units was estimated for each library by dividing the summed read lengths aligned  
511 to 5S rRNA by the product between 5S RNA gene length (119) and genome-wide read  
512 coverage. For estimation of copy number of the *C. elegans* 45S rDNA units, the reads  
513 mapped to the end sequence of the chromosome I (chrI: 15,057,500-15,072,434) were  
514 extracted and aligned against the ITS1. Sequences with alignment length > 21 bps were

515 kept for further calculation. The 45S rDNA copy number in each library was estimated in  
516 a way similar to that for 5S rDNA.

517 For copy number estimation of *C. briggsae* 5S rDNA units, the reads mapped to the region  
518 of the chrIII: 10,555,000-10,660,000 (CB4) were extracted. The extracted reads were  
519 aligned against the 5S rRNA-coding sequences and two existing 5S rDNA units with  
520 BLASTN. Reads were retained for further analysis if their alignment sizes were bigger  
521 than 17, 170 and 170 bps for 5S RNA-coding sequence, *cbr*-5S unit 1.1 and *cbr*-5S unit  
522 2.1, respectively. The copy number of 5S rDNA units was calculated in the same way as  
523 that in *C. elegans*. To extract all the reads mapped to the *C. briggsae* 45S rDNA cluster, a  
524 pseudo-chromosome was generated using chrI: 395,000-417,500 (CB4), which consisted  
525 of partial 26S rRNA coding sequence and its five protein-coding genes flanking the rDNA  
526 gene, and 100 copies of the *C. briggsae* 45S rDNA unit derived from SLR reads [23].  
527 Reads mapped to the pseudo-chromosome were extracted and aligned against the *cbr*-ITS1  
528 sequence with BLASTN. The estimated copy number of the 45S rDNA units was  
529 calculated in the same way as that in *C. elegans*.

### 530 **Validation of genomic localization and structure of assembled rDNA clusters**

531 To validate the genomic localization of the assembled rDNA clusters in *C. elegans* N2 and  
532 *C. briggsae* AF16, the Hi-C sequencing data from L1 stage animals [28,69] were employed  
533 to confirm the linkage between the rDNA clusters and their host chromosomes. For *C.*  
534 *elegans* reads, the rDNA pseudo-chromosome, which contains 50 copies of *cel*-5S unit 1.1  
535 or 10 copies of *cel*-45S rDNA, was included into the reference genome for mapping of Hi-  
536 C reads. After trimming reads with Trimmomatic (v0.35) [70], the remaining reads were  
537 input to Juicer (v1.5) [71] with default parameters to find chromatin interactions between



538 the rDNA pseudo-chromosome and host chromosomes. The density of interaction was  
539 normalized and visualized in R with circlize package (v0.4.7) [66,72]. The linkage between  
540 the rDNA clusters and their host chromosomes in *C. briggsae* was performed in the same  
541 way as that in *C. elegans*. Specifically, the rDNA pseudo-chromosomes consisting of 50  
542 copies of *cbr-5S* unit 1.1, or 50 copies of *cbr-5S* unit 2.1 and unit 2.2 with mixed  
543 arrangement, or 10 copies of *cbr-45S* rDNA, were individually included to the *C. briggsae*  
544 genome assembly CB4, respectively.

545 To evaluate the structure of the reconstructed 5S rDNA clusters, the existing rDNA cluster  
546 sequences in reference genome were replaced by the reconstructed rDNA sequence  
547 consisting of the minimum estimated copy number. The ONT reads were mapped against  
548 the modified reference genomes incorporated with the reconstructed rDNA sequence using  
549 Minimap2 with default parameters. The coverage within the reconstructed rDNA cluster  
550 regions was visualized in R with ggplot2 package [65].

### 551 **Molecular biology, transgenesis, and imaging**

552 All promoter fragments were amplified from N2 genomic DNA with PCR primers listed  
553 in Table S9. The *miniMos* targeting vector pCFJ909 was modified to include a genomic  
554 coding region of *his-24* upstream of the GFP coding sequence to facilitate nuclear  
555 localization, as previously described [73]. The fragments were cloned into the modified  
556 pCFJ909 [36], resulting in a reporter cassette consisting of the sequences coding HIS-  
557 24::GFP or mCherry::HIS-24 and the sequence of *pie-1* 3' UTR as described previously  
558 [74]. The vector was used for transgenesis with *miniMos* technique [36]. The transgene  
559 insertion site was determined using inverse PCR [36]. All micrographs were acquired with

560 an inverted Leica SP5 confocal microscope equipped with two hybrid detectors at a  
561 constant ambient temperature of approximately 20°C.

562

### 563 **Data access**

564 All base-called Nanopore reads from this study have been submitted to the NCBI  
565 BioProject database (<https://www.ncbi.nlm.nih.gov/bioproject>) under accession number  
566 PRJNA562392. The SRA and ENA accession number for each library is listed in Table S7.

567 The sequences of rDNA units from this study were deposited in GenBank under accession  
568 number: MN519135 for *cel*-5S unit 1.1, MN519140 for *cel*-45S rDNA unit, MN519137  
569 for *cbr*-5S unit 1.1, MN519138 for *cbr*-5S unit 2.1, and MN519141 for *cbr*-45S rDNA unit.

570 Variant sequences for each rDNA unit and custom scripts for analyzing INDELs and SNPs  
571 of ONT reads with rDNA sequences were deposited in GitHub  
572 [https://github.com/qiutaoding/QD\\_nanoKit\\_py3/tree/master/rDNA](https://github.com/qiutaoding/QD_nanoKit_py3/tree/master/rDNA).

573

### 574 **Acknowledgments**

575 We thank Dr. Cindy Tan for logistic support and members of Zhao's lab for helpful  
576 comments. Part of strains in this study were provided by the CGC, which is funded by NIH  
577 Office of Research Infrastructure Programs (P40 OD010440). The phylogenetic tree data  
578 for 330 *C. elegans* wild-isolates was kindly provided by Dr. Erik Andersen. This work  
579 was supported by General Research Funds (HKBU12100917, HKBU12123716,  
580 N\_HKBU201/18, HKBU12100118) from Hong Kong Research Grant Council and HKBU

581 Research Committee and Interdisciplinary Research Clusters Matching Scheme 2019/20  
582 for 2017/18 to ZZ.

583

## 584 **Author Contributions**

585 QD performed *C. elegans* CB4856, *C. briggsae* AF16, and transgenic animals Nanopore  
586 sequencing. QD and XR performed *C. elegans* N2 animal synchronization and Nanopore  
587 sequencing. LC and VWH generated the two transgenic strains. QD and RL performed  
588 primary data analysis. QD performed rDNA variants characterization and manual rDNA  
589 cluster assembly. RL performed Hi-C analysis. QD upload base-called data to SRA for  
590 data sharing. ZZ and RL coordinated the project. QD, RL, and ZZ drafted the manuscript.

591

## 592 **Conflict of Interest**

593 None declared.

594

## 595 **References**

- 596 1. Dammann R, Lucchini R, Koller T, Sogo JM. Chromatin structures and transcription  
597 of rDNA in yeast *Saccharomyces cerevisiae*. *Nucleic Acids Res.* 1993;21: 2331–  
598 2338. doi:10.1093/nar/21.10.2331
- 599 2. Ellis RE, Sulston JE, Coulson AR. The rDNA of *C. elegans*: sequence and structure.  
600 *Nucleic Acids Res.* 1986;14: 2345–2364.

- 601 3. Lee Y, Kim M, Han J, Yeom KH, Lee S, Baek SH, et al. MicroRNA genes are  
602 transcribed by RNA polymerase II. *EMBO J.* 2004;23: 4051–4060.  
603 doi:10.1038/sj.emboj.7600385
- 604 4. Wai HH, Vu L, Oakes M, Nomura M. Complete deletion of yeast chromosomal  
605 rDNA repeats and integration of a new rDNA repeat: use of rDNA deletion strains  
606 for functional analysis of rDNA promoter elements in vivo. *Nucleic Acids Res.*  
607 2000;28: 3524–3534. doi:10.1093/nar/28.18.3524
- 608 5. Thompson O, Edgley M, Strasbourger P, Flibotte S, Ewing B, Adair R, et al. The  
609 million mutation project: a new approach to genetics in *Caenorhabditis elegans*.  
610 *Genome Res.* Cold Spring Harbor Laboratory Press; 2013;23: 1749–62.  
611 doi:10.1101/gr.157651.113
- 612 6. Xu B, Li H, Perry JM, Singh VP, Unruh J, Yu Z, et al. Ribosomal DNA copy number  
613 loss and sequence variation in cancer. *PLoS Genet.* 2017;13: e1006771.  
614 doi:10.1371/journal.pgen.1006771
- 615 7. Lu KL, Nelson JO, Watase GJ, Warsinger-Pepe N, Yamashita YM.  
616 Transgenerational dynamics of rDNA copy number in *Drosophila* male germline  
617 stem cells. *Elife.* 2018;7: e32421. doi:10.7554/eLife.32421
- 618 8. Mansisidor A, Molinar T, Srivastava P, Dartis DD, Pino Delgado A, Blitzblau HG,  
619 et al. Genomic copy-number loss is rescued by self-limiting production of DNA  
620 circles. *Mol Cell.* 2018;72: 583-593.e4. doi:10.1016/j.molcel.2018.08.036
- 621 9. Farslow JC, Lipinski KJ, Packard LB, Edgley ML, Taylor J, Flibotte S, et al. Rapid  
622 Increase in frequency of gene copy-number variants during experimental evolution

- 623 in *Caenorhabditis elegans*. *BMC Genomics*. 2015;16. doi:10.1186/s12864-015-  
624 2253-2
- 625 10. Vierna J, Wehner S, Höner Zu Siederdisen C, Martínez-Lage A, Marz M.  
626 Systematic analysis and evolution of 5S ribosomal DNA in metazoans. *Heredity*  
627 (Edinb). 2013;111: 410–421. doi:10.1038/hdy.2013.63
- 628 11. Bik HM, Fournier D, Sung W, Bergeron RD, Thomas WK. Intra-Genomic Variation  
629 in the Ribosomal Repeats of Nematodes. *PLoS One*. 2013;8: e78230.  
630 doi:10.1371/journal.pone.0078230
- 631 12. Kuo BA, Gonzalez IL, Gillespie DA, Sylvester JE. Human ribosomal RNA variants  
632 from a single individual and their expression in different tissues. *Nucleic Acids Res*.  
633 1996;24: 4817–4824. doi:10.1093/nar/24.23.4817
- 634 13. Tseng H, Chou W, Wang J, Zhang X, Zhang S, Schultz RM. Mouse ribosomal RNA  
635 genes contain multiple differentially regulated variants. *PLoS One*. 2008;3: e1843.  
636 doi:10.1371/journal.pone.0001843
- 637 14. James SA, O’Kelly MJT, Carter DM, Davey RP, Van Oudenaarden A, Roberts IN.  
638 Repetitive sequence variation and dynamics in the ribosomal DNA array of  
639 *Saccharomyces cerevisiae* as revealed by whole-genome resequencing. *Genome Res*.  
640 2009;19: 626–635. doi:10.1101/gr.084517.108
- 641 15. Coen E, Strachan T, Dover G. Dynamics of concerted evolution of ribosomal DNA  
642 and histone gene families in the melanogaster species subgroup of *Drosophila*. *J Mol*  
643 *Biol*. 1982;158: 17–35. doi:10.1016/0022-2836(82)90448-X

- 644 16. Garcia S, Kovařík A, Leitch AR, Garnatje T. Cytogenetic features of rRNA genes  
645 across land plants: analysis of the Plant rDNA database. *Plant J.* 2017;89: 1020–  
646 1030. doi:10.1111/tpj.13442
- 647 17. Nelson DW, Honda BM. Genes coding for 5S ribosomal RNA of the nematode  
648 *Caenorhabditis elegans*. *Gene.* 1985;38: 245–251. doi:10.1016/0378-  
649 1119(85)90224-0
- 650 18. Nelson DW, Honda BM. Two highly conserved transcribed regions in the 5S DNA  
651 repeats of the nematodes *Caenorhabditis elegans* and *Caenorhabditis briggsae*.  
652 *Nucleic Acids Res.* 1989;17: 8657–8667. doi:10.1093/nar/17.21.8657
- 653 19. Stein LD, Bao Z, Blasiar D, Blumenthal T, Brent MR, Chen N, et al. The genome  
654 sequence of *Caenorhabditis briggsae*: A platform for comparative genomics. *PLoS*  
655 *Biol.* 2003;1: E45. doi:10.1371/journal.pbio.0000045
- 656 20. Murphy SJ, Cheville JC, Zarei S, Johnson SH, Sikkink RA, Kosari F, et al. Mate  
657 pair sequencing of whole-genome-amplified DNA following laser capture  
658 microdissection of prostate. *DNA Res.* 2012;19: 395–406.  
659 doi:10.1093/dnares/dss021
- 660 21. Genome sequence of the nematode *C. elegans*: a platform for investigating biology.  
661 *Science* (80- ). The Washington University Genome Sequencing Center, Box 8501,  
662 4444 Forest Park Parkway, St. Louis, MO 63108, USA. worm@watson.wustl.edu;  
663 1998;282: 2012–2018. Available:  
664 [http://www.ncbi.nlm.nih.gov/entrez/query.fcgi?cmd=Retrieve&db=PubMed&dopt](http://www.ncbi.nlm.nih.gov/entrez/query.fcgi?cmd=Retrieve&db=PubMed&dopt=Citation&list_uids=9851916)  
665 [=Citation&list\\_uids=9851916](http://www.ncbi.nlm.nih.gov/entrez/query.fcgi?cmd=Retrieve&db=PubMed&dopt=Citation&list_uids=9851916)

- 666 22. Belton J-M, McCord RP, Gibcus JH, Naumova N, Zhan Y, Dekker J. Hi-C: A  
667 comprehensive technique to capture the conformation of genomes. *Methods*.  
668 2012;58: 268–276. doi:10.1016/j.ymeth.2012.05.001
- 669 23. Li R, Hsieh C-L, Young A, Zhang Z, Ren X, Zhao Z. Illumina Synthetic Long Read  
670 Sequencing Allows Recovery of Missing Sequences even in the “Finished” *C.*  
671 *elegans* Genome. *Sci Rep*. 2015;5: 10814. doi:10.1038/srep10814
- 672 24. Ross JA, Koboldt DC, Staisch JE, Chamberlin HM, Gupta BP, Miller RD, et al.  
673 *Caenorhabditis briggsae* recombinant inbred line genotypes reveal inter-strain  
674 incompatibility and the evolution of recombination. *PLoS Genet*. 2011;7: e1002174.  
675 doi:10.1371/journal.pgen.1002174
- 676 25. Bi Y, Ren X, Li R, Ding Q, Xie D, Zhao Z. Specific interactions between autosome  
677 and X chromosomes cause hybrid male sterility in *Caenorhabditis* species. *Genetics*.  
678 2019;212. doi:10.1534/genetics.119.302202
- 679 26. Bi Y, Ren X, Yan C, Shao J, Xie D, Zhao Z. A Genome-wide hybrid incompatibility  
680 landscape between *Caenorhabditis briggsae* and *C. nigoni*. *PLoS Genet*. 2015;11:  
681 e1004993. doi:10.1371/journal.pgen.1004993
- 682 27. Yan C, Bi Y, Yin D, Zhao Z. A method for rapid and simultaneous mapping of  
683 genetic loci and introgression sizes in nematode species. *PLoS One*. 2012;7: e43770.  
684 doi:10.1371/journal.pone.0043770
- 685 28. Ren X, Li R, Wei X, Bi Y, Ho VWS, Ding Q, et al. Genomic basis of recombination  
686 suppression in the hybrid between *Caenorhabditis briggsae* and *C. nigoni*. *Nucleic*  
687 *Acids Res*. 2018; doi:10.1093/nar/gkx1277

- 688 29. Krishnakumar R, Sinha A, Bird SW, Jayamohan H, Edwards HS, Schoeniger JS, et  
689 al. Systematic and stochastic influences on the performance of the MinION  
690 nanopore sequencer across a range of nucleotide bias. *Sci Rep.* 2018;8: 3159.  
691 doi:10.1038/s41598-018-21484-w
- 692 30. Yoshimura J, Ichikawa K, Shoura MJ, Artiles KL, Gabdank I, Wahba L, et al.  
693 ReCompleting the *Caenorhabditis elegans* genome. 2019;  
694 doi:10.1101/gr.244830.118
- 695 31. Tyson JR, O’Neil NJ, Jain M, Olsen HE, Hieter P, Snutch TP. MinION-based long-  
696 read sequencing and assembly extends the *Caenorhabditis elegans* reference genome.  
697 *Genome Res.* Cold Spring Harbor Laboratory Press; 2018;28: 266–274.  
698 doi:10.1101/gr.221184.117
- 699 32. Kim C, Kim J, Kim S, Cook DE, Evans KS, Andersen EC, et al. Long-read  
700 sequencing reveals intra-species tolerance of substantial structural variations and  
701 new subtelomere formation in *C. elegans*. *Genome Res.* 2019;  
702 doi:10.1101/gr.246082.118
- 703 33. Loman NJ, Watson M. Successful test launch for nanopore sequencing. *Nat*  
704 *Methods.* 2015;12: 303–4. doi:10.1038/nmeth.3327
- 705 34. Harris TW, Arnaboldi V, Cain S, Chan J, Chen WJ, Cho J, et al. WormBase: A  
706 modern Model Organism Information Resource. *Nucleic Acids Res.* Oxford  
707 University Press; 2020;48: D762–D767. doi:10.1093/nar/gkz920
- 708 35. Cook DE, Zdraljevic S, Roberts JP, Andersen EC. CeNDR, the *Caenorhabditis*  
709 *elegans* natural diversity resource. *Nucleic Acids Res.* 2017;10: 679–690.



- 710           doi:10.1093/nar/gkw893
- 711   36.   Frøkjær-Jensen C, Davis MW, Sarov M, Taylor J, Flibotte S, LaBella M, et al.  
712           Random and targeted transgene insertion in *Caenorhabditis elegans* using a modified  
713           Mos1 transposon. *Nat Methods*. 2014;11: 529–534. doi:10.1038/nmeth.2889
- 714   37.   Barstead R, Moulder G, Cobb B, Frazee S, Henthorn D, Holmes J, et al. Large-scale  
715           screening for targeted knockouts in the *Caenorhabditis elegans* genome. *G3 Genes,  
716           Genomes, Genet*. 2012;2: 1415–1425. doi:10.1534/g3.112.003830
- 717   38.   Koch R, Van Luenen HGAM, Van Der Horst M, Thijssen KL, Plasterk RHA. Single  
718           nucleotide polymorphisms in wild isolates of *Caenorhabditis elegans*. *Genome Res*.  
719           2000;10: 1690–1696. doi:10.1101/gr.GR-1471R
- 720   39.   Li H. Minimap and miniasm: Fast mapping and de novo assembly for noisy long  
721           sequences. *Bioinformatics*. 2016; doi:10.1093/bioinformatics/btw152
- 722   40.   Vaser R, Sović I, Nagarajan N, Šikić M. Fast and accurate de novo genome assembly  
723           from long uncorrected reads. *Genome Res*. 2017;27: 737–746.  
724           doi:10.1101/gr.214270.116
- 725   41.   Simão FA, Waterhouse RM, Ioannidis P, Kriventseva E V., Zdobnov EM. BUSCO:  
726           assessing genome assembly and annotation completeness with single-copy  
727           orthologs. *Bioinformatics*. 2015;31: 3210–3212. doi:10.1093/bioinformatics/btv351
- 728   42.   D. E. Wimber DMS. Localization of 5S RNA Genes on *Drosophila* Chromosomes  
729           by RNA-DNA Hybridization. *Science* (80- ). 1970;170: 639–641.
- 730   43.   Yu S, Lemos B. A Portrait of Ribosomal DNA Contacts with Hi-C Reveals 5S and

- 731 45S rDNA Anchoring Points in the Folded Human Genome. *Genome Biol Evol.*  
732 2016;8: 3545–3558. doi:10.1093/gbe/evw257
- 733 44. Johnson SM, Tan FJ, McCullough HL, Riordan DP, Fire AZ. Flexibility and  
734 constraint in the nucleosome core landscape of *Caenorhabditis elegans* chromatin.  
735 *Genome Res.* 2006;16: 1505–1516. doi:10.1101/gr.5560806
- 736 45. Siddiqi IN, Dodd JA, Vu L, Eliason K, Oakes ML, Keener J, et al. Transcription of  
737 chromosomal rRNA genes by both RNA polymerase I and II in yeast *uaf30* mutants  
738 lacking the 30 kDa subunit of transcription factor UAF. *EMBO J.* 2001;20: 4512–  
739 4521. doi:10.1093/emboj/20.16.4512
- 740 46. Stults DM, Killen MW, Pierce HH, Pierce AJ. Genomic architecture and inheritance  
741 of human ribosomal RNA gene clusters. *Genome Res.* Cold Spring Harbor  
742 Laboratory Press; 2008;18: 13–8. doi:10.1101/gr.6858507
- 743 47. Hillier LDW, Miller RD, Baird SE, Chinwalla A, Fulton LA, Koboldt DC, et al.  
744 Comparison of *C. elegans* and *C. briggsae* genome sequences reveals extensive  
745 conservation of chromosome organization and synteny. *PLoS Biol.* 2007;5: e167.  
746 doi:10.1371/journal.pbio.0050167
- 747 48. Ren X, Li R, Wei X, Bi Y, Ho VWS, Ding Q, et al. Genomic basis of recombination  
748 suppression in the hybrid between *Caenorhabditis briggsae* and *C. nigoni*. *Nucleic*  
749 *Acids Res.* 2018;46. doi:10.1093/nar/gkx1277
- 750 49. Shafin K, Pesout T, Lorig-roach R, Haukness M, Olsen HE, Armstrong J, et al.  
751 Efficient de novo assembly of eleven human genomes using PromethION  
752 sequencing and a novel nanopore toolkit. *bioRxiv.* 2019;

- 753 50. Kuderna LFK, Lizano E, Julià E, Gomez-Garrido J, Serres-Armero A, Kuhlwilm M,  
754 et al. Selective single molecule sequencing and assembly of a human Y chromosome  
755 of African origin. *Nat Commun.* 2019;10: 4. doi:10.1038/s41467-018-07885-5
- 756 51. Stevens L, Félix M-A, Beltran T, Braendle C, Caurcel C, Fausett S, et al.  
757 Comparative genomics of 10 new *Caenorhabditis* species. *Evol Lett.* 2019;3: 217–  
758 236. doi:10.1002/evl3.110
- 759 52. Gibbons JG, Branco AT, Godinho SA, Yu S, Lemos B. Concerted copy number  
760 variation balances ribosomal DNA dosage in human and mouse genomes. *Proc Natl*  
761 *Acad Sci.* 2015;112: 2485–2490. doi:10.1073/pnas.1416878112
- 762 53. Stage DE, Eickbush TH. Sequence variation within the rRNA gene loci of 12  
763 *Drosophila* species. *Genome Res.* Cold Spring Harbor Laboratory Press; 2007;17:  
764 1888–1897. doi:10.1101/gr.6376807
- 765 54. Picard B, Wegnez M. Isolation of a 7S particle from *Xenopus laevis* oocytes: A 5S  
766 RNA-protein complex. *Proc Natl Acad Sci U S A.* 1979;76: 241–245.  
767 doi:10.1073/pnas.76.1.241
- 768 55. Miga KH, Koren S, Rhie A, Vollger MR, Gershman A, Bzikadze A, et al. Telomere-  
769 to-telomere assembly of a complete human X chromosome. *Nature.* 2020;585: 79–  
770 84. doi:10.1038/s41586-020-2547-7
- 771 56. Jain M, Olsen HE, Turner DJ, Stoddart D, Bulazel K V., Paten B, et al. Linear  
772 assembly of a human centromere on the y chromosome. *Nat Biotechnol.* Nature  
773 Publishing Group; 2018;36: 321–323. doi:10.1038/nbt.4109

- 774 57. Logsdon GA, Vollger MR, Hsieh P, Mao Y, Liskovych MA, Koren S, et al. The  
775 structure, function, and evolution of a complete human chromosome 8.  
776 doi:10.1101/2020.09.08.285395
- 777 58. Porta-de-la-Riva M, Fontrodona L, Villanueva A, Cerón J. Basic *Caenorhabditis*  
778 *elegans* methods: synchronization and observation. *J Vis Exp.* 2012; e4019.  
779 doi:10.3791/4019
- 780 59. Shen W, Le S, Li Y, Hu F. SeqKit: A cross-platform and ultrafast toolkit for  
781 FASTA/Q file manipulation. *PLoS One.* 2016;11: e0163962.  
782 doi:10.1371/journal.pone.0163962
- 783 60. Li H. Minimap2: pairwise alignment for nucleotide sequences. Birol I, editor.  
784 *Bioinformatics.* 2018;34: 3094–3100. doi:10.1093/bioinformatics/bty191
- 785 61. Li H, Handsaker B, Wysoker A, Fennell T, Ruan J, Homer N, et al. The Sequence  
786 Alignment/Map format and SAMtools. *Bioinformatics.* 2009;25: 2078–2079.  
787 doi:10.1093/bioinformatics/btp352
- 788 62. Li H, Durbin R. Fast and accurate long-read alignment with Burrows-Wheeler  
789 transform. *Bioinformatics.* 2010;26: 589–95. doi:10.1093/bioinformatics/btp698
- 790 63. Li H. A statistical framework for SNP calling, mutation discovery, association  
791 mapping and population genetical parameter estimation from sequencing data.  
792 *Bioinformatics.* 2011;27: 2987–2993. doi:10.1093/bioinformatics/btr509
- 793 64. Yu G, Smith DK, Zhu H, Guan Y, Lam TTY. ggtree: an r package for visualization  
794 and annotation of phylogenetic trees with their covariates and other associated data.

- 795           Methods Ecol Evol. 2017; doi:10.1111/2041-210X.12628
- 796   65.   Wickham H. ggplot2. Springer-Verlag New York; 2011. doi:10.1007/978-0-387-  
797           98141-3
- 798   66.   R Core Team. R: A Language and Environment for Statistical Computing [Internet].  
799           Vienna, Austria; 2019. Available: <https://www.r-project.org>
- 800   67.   Altschul SF, Gish W, Miller W, Myers EW, Lipman DJ. Basic local alignment  
801           search tool. J Mol Biol. 1990;215: 403–410. doi:10.1016/S0022-2836(05)80360-2
- 802   68.   Kiełbasa SM, Wan R, Sato K, Horton P, Frith MC. Adaptive seeds tame genomic  
803           sequence comparison. Genome Res. 2011; doi:10.1101/gr.113985.110
- 804   69.   Gabdank I, Ramakrishnan S, Villeneuve AM, Fire AZ. A streamlined tethered  
805           chromosome conformation capture protocol. BMC Genomics. 2016;17.  
806           doi:10.1186/s12864-016-2596-3
- 807   70.   Bolger AM, Lohse M, Usadel B. Trimmomatic: A flexible trimmer for Illumina  
808           sequence data. Bioinformatics. 2014;30: 2114–2120.  
809           doi:10.1093/bioinformatics/btu170
- 810   71.   Durand NC, Shamim MS, Machol I, Rao SSP, Huntley MH, Lander ES, et al. Juicer  
811           provides a one-click system for analyzing loop-resolution Hi-C experiments. Cell  
812           Syst. 2016;3: 95–98. doi:10.1016/j.cels.2016.07.002
- 813   72.   Gu Z, Gu L, Eils R, Schlesner M, Brors B. Circlize implements and enhances  
814           circular visualization in R. Bioinformatics. 2014;30: 2811–2812.  
815           doi:10.1093/bioinformatics/btu393

- 816 73. Zhao Z, Boyle TJ, Liu Z, Murray JI, Wood WB, Waterston RH. A negative  
817 regulatory loop between microRNA and Hox gene controls posterior identities in  
818 *Caenorhabditis elegans*. *PLoS Genet.* 2010;6: e1001089.  
819 doi:10.1371/journal.pgen.1001089
- 820 74. Chen L, Ho VWS, Wong M-K, Huang X, Chan L-Y, Ng HCK, et al. Establishment  
821 of Signaling Interactions with Cellular Resolution for Every Cell Cycle of  
822 Embryogenesis. *Genetics.* *Genetics*; 2018;209: 37–49.  
823 doi:10.1534/genetics.118.300820
- 824
- 825

826 **Tables**

**Table 1. Nead statistics**

| <b>Library name</b> | <b>Total number of reads</b> | <b>Total bases (Gbp)</b> | <b>Mean length (bp)</b> | <b>Median length (bp)</b> | <b>N50 length (bp)</b> | <b>Max mapped length (bp)</b> |
|---------------------|------------------------------|--------------------------|-------------------------|---------------------------|------------------------|-------------------------------|
| <b>N2-EMB</b>       | 789,871                      | 10.8                     | 13,724                  | 13,084                    | 18,558                 | 163,153                       |
| <b>N2-L1</b>        | 199,712                      | 3.7                      | 18,300                  | 13,605                    | 31,265                 | 196,902                       |
| <b>N2-YA</b>        | 822,902                      | 9.3                      | 11,341                  | 9,187                     | 19,566                 | 174,664                       |
| <b>AF16-YA</b>      | 1,433,280                    | 11.1                     | 7,724                   | 4,148                     | 15,427                 | 182,506                       |
| <b>ZZY0600</b>      | 870,874                      | 12.6                     | 14,479                  | 10,248                    | 25,074                 | 247,180                       |
| <b>ZZY0603</b>      | 2,696,939                    | 12.9                     | 4,785                   | 2,463                     | 9,429                  | 252,751                       |
| <b>ZZY0653</b>      | 60,187                       | 0.6                      | 10,720                  | 2,409                     | 27,723                 | 139,839                       |
| <b>CB4856</b>       | 2,294,403                    | 15.1                     | 6,562                   | 2,347                     | 19,197                 | 382,430                       |

EMB: Mix-staged embryos; L1: Larval stage 1; YA: Young adult

827

828

829

830

**Table 2. List of the variants of 5S rDNA unit in *C. elegans* N2 used in this study**

| Variant   | Size (bp) | Copy number | Sequence variation relative to <i>cel</i> -5S unit 1.1                                                                    |
|-----------|-----------|-------------|---------------------------------------------------------------------------------------------------------------------------|
| unit 1.1  | 976       | Dynamic     | Not applicable                                                                                                            |
| unit 1.2  | 976       | 2           | 621T>G                                                                                                                    |
| unit 1.3  | 976       | 4           | 220C>A, 621T>G                                                                                                            |
| unit 1.4  | 976       | 1           | 162C>G, 621T>G                                                                                                            |
| unit 1.5  | 980       | 6           | 309T>C, 318T>C, 325_326insCAAT, 329G>T, 332T>G, 621T>G                                                                    |
| unit 1.6  | 971       | 2           | 766_771delinsC                                                                                                            |
| unit 2.1  | 972       | 29          | 99_102del, 162C>G, 621T>G                                                                                                 |
| unit 2.2  | 972       | 15          | 99_102del, 162C>G, 431T>G, 621T>G                                                                                         |
| unit 2.3  | 972       | 16          | 99_102del, 162C>G                                                                                                         |
| unit 2.4  | 972       | 2           | 99_102del, 162C>G, 220C>A, 621T>G                                                                                         |
| unit 2.5  | 976       | 1           | 99_102del, 162C>G, 335G>C, 407C>T, 621T>G                                                                                 |
| unit 2.6  | 976       | 1           | 99_102del, 162C>G, 309T>C, 318T>C, 325_326insCAAT, 329G>T, 332T>G, 621T>G                                                 |
| unit 2.7  | 976       | 1           | 99_102del, 162C>G, 318T>C, 325_326insCAAT, 329G>A, 332T>G, 339C>T, 621T>G                                                 |
| unit 2.8  | 976       | 6           | 99_102del, 162C>G, 318T>C, 325_326insCAAT, 329G>A, 332T>G, 339C>T, 431T>G, 621T>G, 636T>G                                 |
| unit 2.9  | 976       | 9           | 99_102del, 162C>G, 318T>C, 325_326insCAAT, 329G>T, 332T>G, 339C>T, 621T>G                                                 |
| unit 2.10 | 976       | 3           | 99_102del, 162C>G, 318T>C, 325_326insCAAT, 329G>T, 332T>G, 339C>T, 431T>G, 621T>G                                         |
| unit 2.11 | 963       | 4           | 99_102del, 162C>G, 318T>C, 325_326insCAAT, 329G>T, 332T>G, 339C>T, 393_405del, 431T>G, 621T>G                             |
| unit 2.12 | 982       | 3           | 99_102del, 162C>G, 309T>C, 318T>C, 325_326insCAAT, 329G>T, 332T>G, 354_355insGGTATT, 367A>T, 371T>A, 621T>G               |
| unit 2.13 | 984       | 1           | 99_102del, 162C>G, 309T>C, 318T>C, 325_326insCAAT, 329G>T, 332T>G, 354_355insGGTATT, 367A>T, 371T>A, 621T>G, 718_719insGA |
| unit 3.1  | 942       | 7           | 780_809del, 99_102del, 162C>G, 621T>G                                                                                     |
| unit 3.2  | 946       | 3           | 780_809del, 621T>G                                                                                                        |
| unit 3.3  | 950       | 1           | 780_809del, 220C>A, 309T>C, 318T>C, 325_326insCAAT, 329G>T, 332T>G, 621T>G                                                |
| unit s1*  | 975       | 0           | 99_102del, 162C>G, 325_326insA, 393delC, 621T>G                                                                           |
| unit s2*  | 981       | 0           | 354_355insGGTATT, 367A>T, 371T>A, 545G>A, 621T>G                                                                          |
| unit s3*  | 972       | 0           | 325_326insCAAT, 329G>A, 332T>G, 339C>T, 431T>G, 621T>G                                                                    |

\*Combinations of variants in s1-s3 are not identified in the 5S rDNA cluster. Del: deletion. Ins: insertion. Delins: deletion followed by insertion.



## 832 **Figure Legends**

833 **Fig. 1 Structure of the *C. elegans* (N2) 5S rDNA cluster.** (a) INDELS identified with  
834 Nanopore reads within 5S rDNA unit. Shown are normalized INDEL occurrences along  
835 with GC content. Deletion and insertion identified with Nanopore raw reads are shown in  
836 red and blue, respectively. Cross-validated INDELS used in the subsequent analysis are  
837 indicated with black circles (see Methods). (b) SNPs in the 5S rDNA are identified with  
838 existing NGS data. SNPs present or absent in new rDNA variants are colored in red and  
839 black, respectively. (c) Structure of the 5S rDNA-containing regions on the chromosome  
840 V in the current *C. elegans* N2 reference genome (WBcel235). (d) Structure of the 5S  
841 rDNA cluster assembled by ONT reads, which carries a total of at least 167 partial or  
842 complete units. The cluster is divided into 5 regions (R1-5) based on the SNPs and INDELS  
843 present in each unit or the position relative to Repeat 1a. Newly identified rDNA units or  
844 unique repeats are differentially color coded (see Table 2). Variation in rDNA copy number  
845 is indicated with dash line. Note that three Repeat 1a are inserted into 5S rDNA unit at  
846 same position within R5.

847 **Fig. 2 Structural variations within 5S rDNA cluster between our *C. elegans* N2 and**  
848 **other N2-derived strains.** (a) Overview of the structures of 5S rDNA clusters for five  
849 strains as shown in Fig. 1d. Strain names are indicated on the left. Position and size of  
850 transgenic insertions are indicated in scale. (b) Comparison of unit compositions and  
851 estimated copy number in R1. Identified variation in unit composition is highlighted with  
852 vertical dashed line. (c-f) Comparison of unit compositions in R2 (c), R3 (d), R4 (e), and  
853 R5 (f) as in (b). (g) Ancestry of the strains based on strain history. Our N2 was shipped  
854 from Waterston lab in 2010. PD1074 was a recent derivative of VC2010 that was derived

855 from a separate N2 in Don Moerman lab. ZZY0600 and ZZY0603 were generated by  
856 transgene insertion into *unc-119(tm4063)* worms, which was derived from another *C.*  
857 *elegans* N2 in Mitani lab.

858 **Fig. 3 Structural variations within 5S rDNA clusters between *C. elegans* N2 and**  
859 **CB4856 strains.** (a) INDELs identified with CB4856 Nanopore reads within 5S rDNA  
860 unit as in Fig. 1a. Cross-validated INDELs used in the subsequent analysis are indicated  
861 with black circles (see Methods). (b) SNPs in the 5S rDNA are identified with existing  
862 NGS data as in Fig. 1b. SNPs present or absent in new rDNA variants are colored in red  
863 and black, respectively. (c) Overview of the structures of 5S rDNA clusters between N2  
864 and CB4856 as shown in Fig. 1d. Note the differences between the two, including lack of  
865 unit 1.1 (red) predominately seen in N2, whereas the unit (*cel-5S* 2.14) is unique to and  
866 predominately seen in CB4856. (d) Structure of the *C. elegans* CB4856 5S rDNA cluster.  
867 The Repeat 1a and 1b are shown as in Fig. 1d. (e) Evolutionary trajectory of the 5S rDNA  
868 unit 3 in *C. elegans*. Shown is a phylogenetic tree generated using SNPs from 330 *C.*  
869 *elegans* wild isolates. Strains with or without *cel-5S* unit 3 are colored in yellow and black,  
870 respectively. For simplicity, only N2 and CB4856 are shown (see Fig. S3 for a full list of  
871 strain names).

872 **Fig. 4 Evaluation of the ONT reads assembled *C. briggsae* AF16 genome.** (a)  
873 Schematic representation of AF16 long reads assembled contig lengths. (b) Dot plot of  
874 corresponding chromosomes between CB4 and ONT reads assembled genome. (c) Bar  
875 chart with summary assessment for the proportion of genes present in three assembled  
876 genomes. AF16-ONT: the assembled *C. briggsae* draft genome in this study, WBcel235:  
877 the *C. elegans* N2 reference genome, CB4: the *C. briggsae* AF16 reference genome.

878 **Fig. 5 Characterization of the 5S rDNA units in *C. briggsae* AF16.** (a) Phylogenetic  
879 tree of two divergent 5S rDNA units in *C. briggsae* (*cbr*) and the canonical *C. elegans* (*cel*)  
880 5S rDNA unit. (b) Dot plot showing the sequence alignment between two *C. briggsae* 5S  
881 rDNA units. (c) Multiple sequence alignment of 5S rDNA units from *C. elegans* and *C.*  
882 *briggsae*. Alignments for the 5S rRNA gene is shaded in the grey box (indicated at the top).  
883 (d) A contig was misassembled into the rDNA cluster on chromosome III in the reference  
884 genome CB4. (e) Schematic representation of *C. briggsae* AF16 5S rDNA cluster  
885 annotated by ONT reads.

886 **Fig. 6 Comparison of 45S rDNA units and cluster between strains and species.** (a)  
887 Comparison of 45S rDNA units between *C. elegans* and *C. briggsae*. (b) Dot plot showing  
888 the alignment of the 45S rDNA unit sequences between two species. (c) Pairwise sequence  
889 alignment of the 45S rDNA unit between two species. The 18S, 5.8S, and 26S RNA gene  
890 regions are shaded in grey. Conservation scores are shown at the bottom. (d) Schematics  
891 of the 45S rDNA cluster of *C. elegans* N2 and CB4856 annotated by ONT reads. In N2,  
892 the cluster left and right boundaries are flanked by partial 26S rRNA sequences and a  
893 partial ETS, respectively. In the 45S rDNA-containing region in *C. elegans* CB4856, the  
894 45S rDNA cluster is located at the right end of chromosome I while fragmented 45S rDNA  
895 sequences along with other sequences are located at the left end. The estimated copy  
896 number of the unit is shown. Note that both the chromosome left and right ends are flanked  
897 by a ~11.6 kb fragment derived from the left end of chromosome IV (pink, see Fig. S7),  
898 which is interrupted by some non-homologous sequences (white box). A pSX1 cluster is  
899 also found adjacent to 45S rDNA. (e) Schematics of the *C. briggsae* AF16 genomic regions  
900 containing the 45S rDNA annotated by ONT reads in this study. Reconstructed 45S rDNA

901 cluster is located at the left end of chromosome V containing about 85 copies of 45 rDNA  
902 unit. Bottom: A misassembled contig containing partial 26S rRNA gene sequences and 5  
903 protein coding genes was assigned to chromosome I in CB4.

904

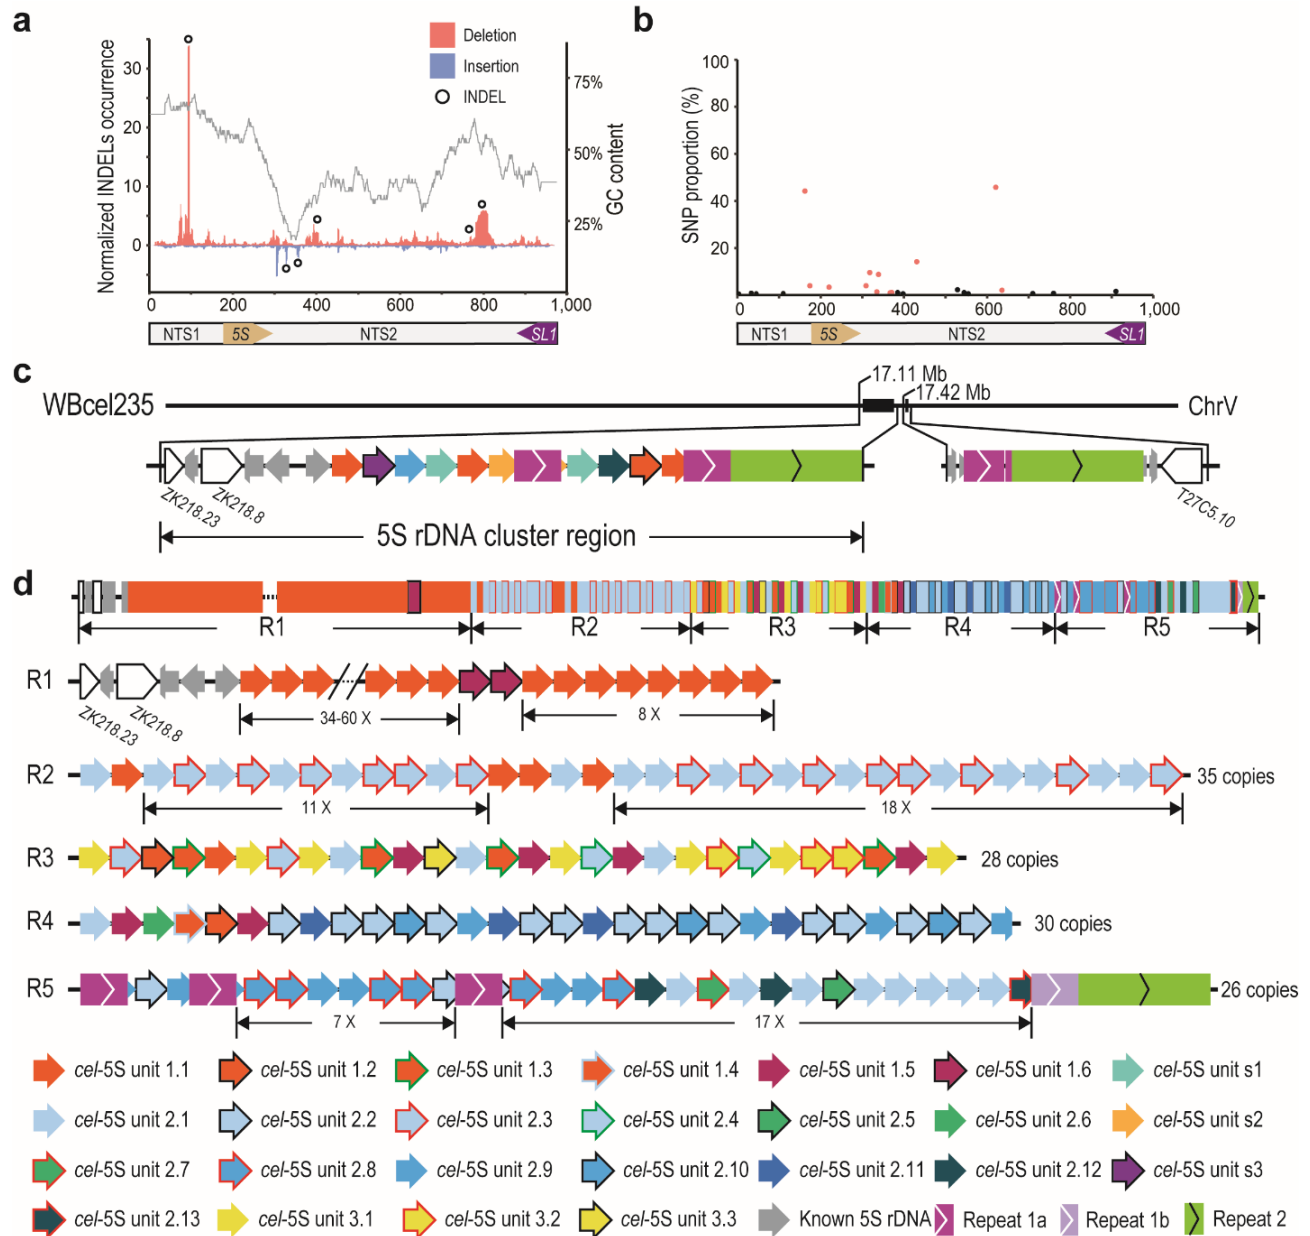

**Figure 1**

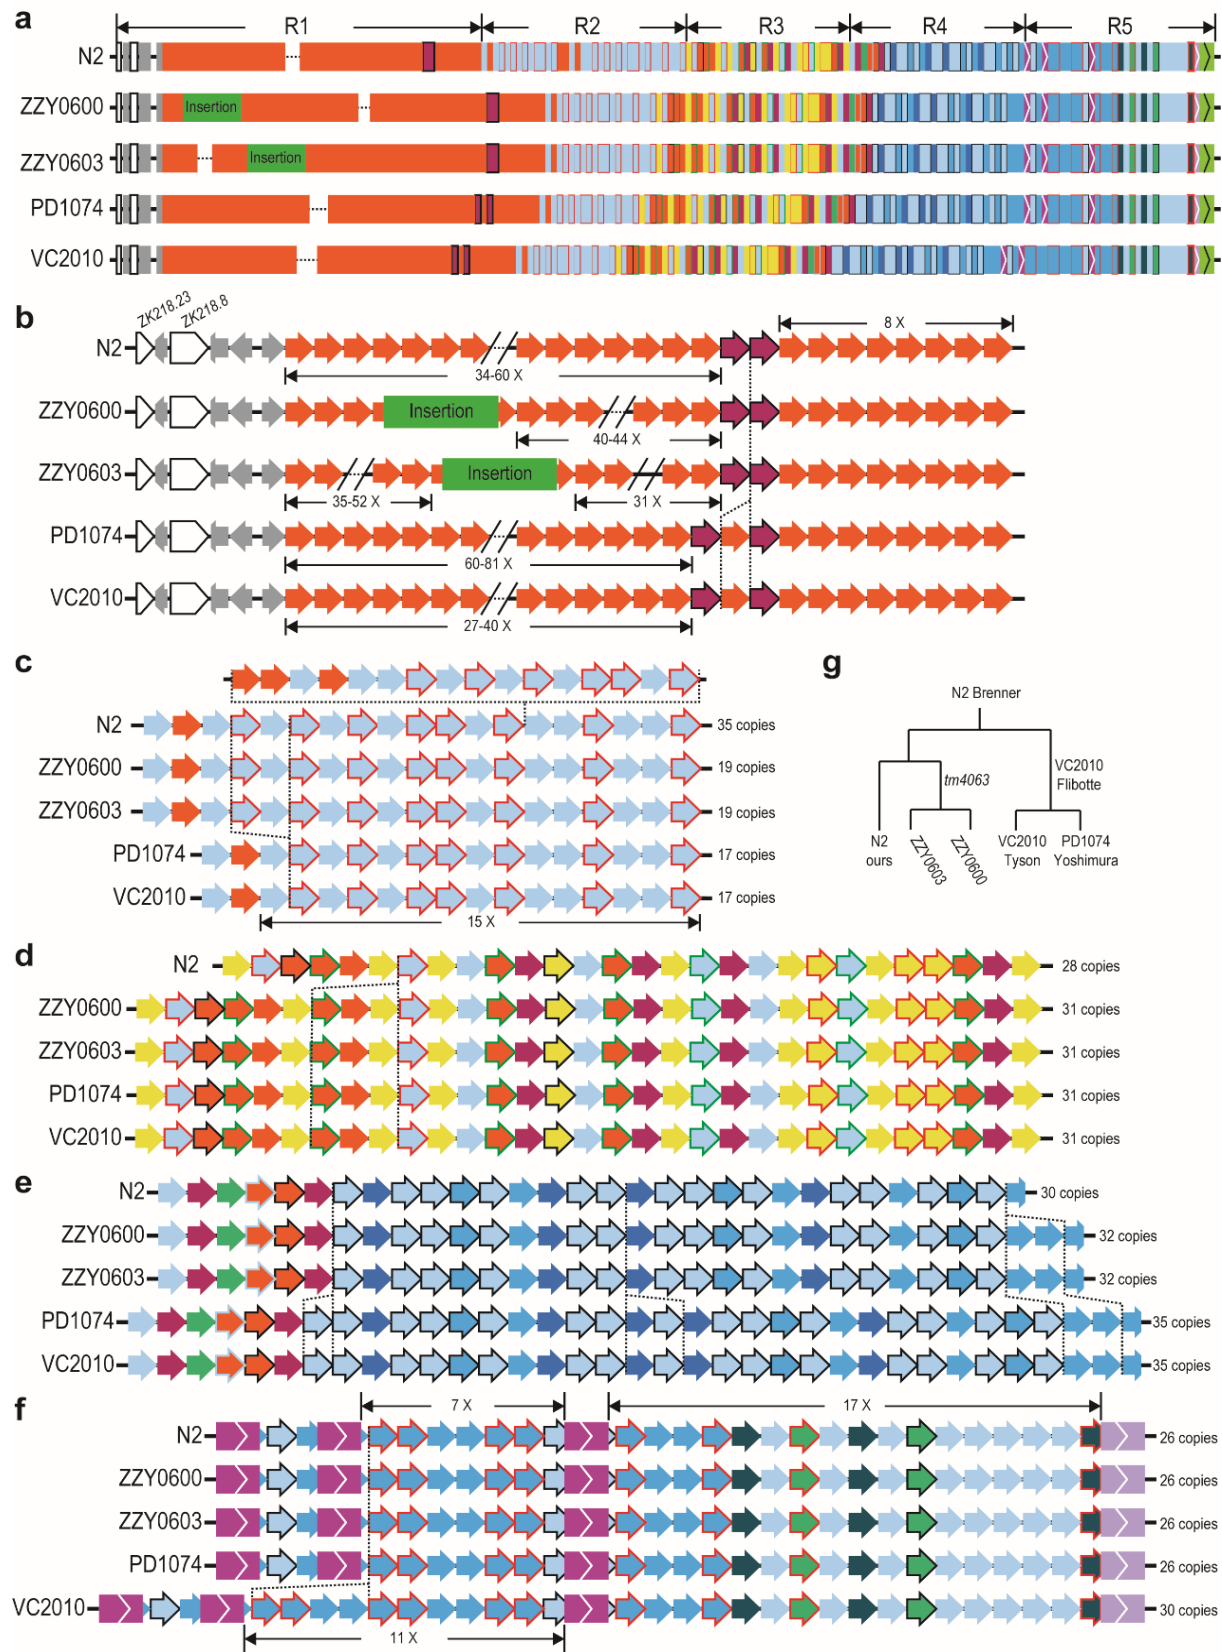

**Figure 2**

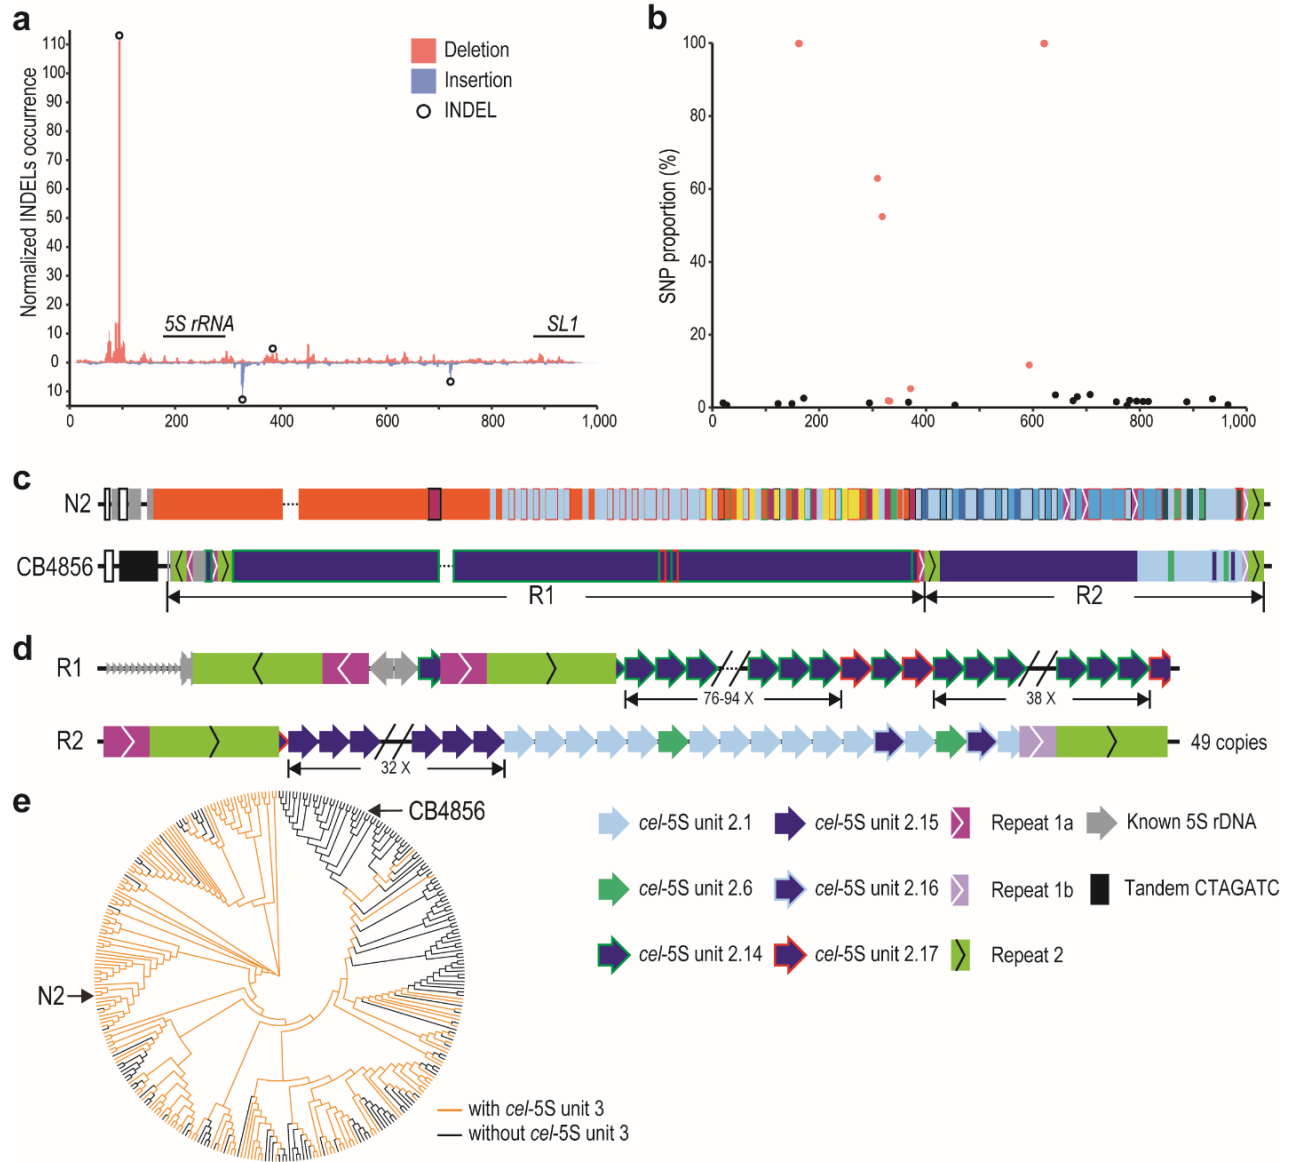

**Figure 3**

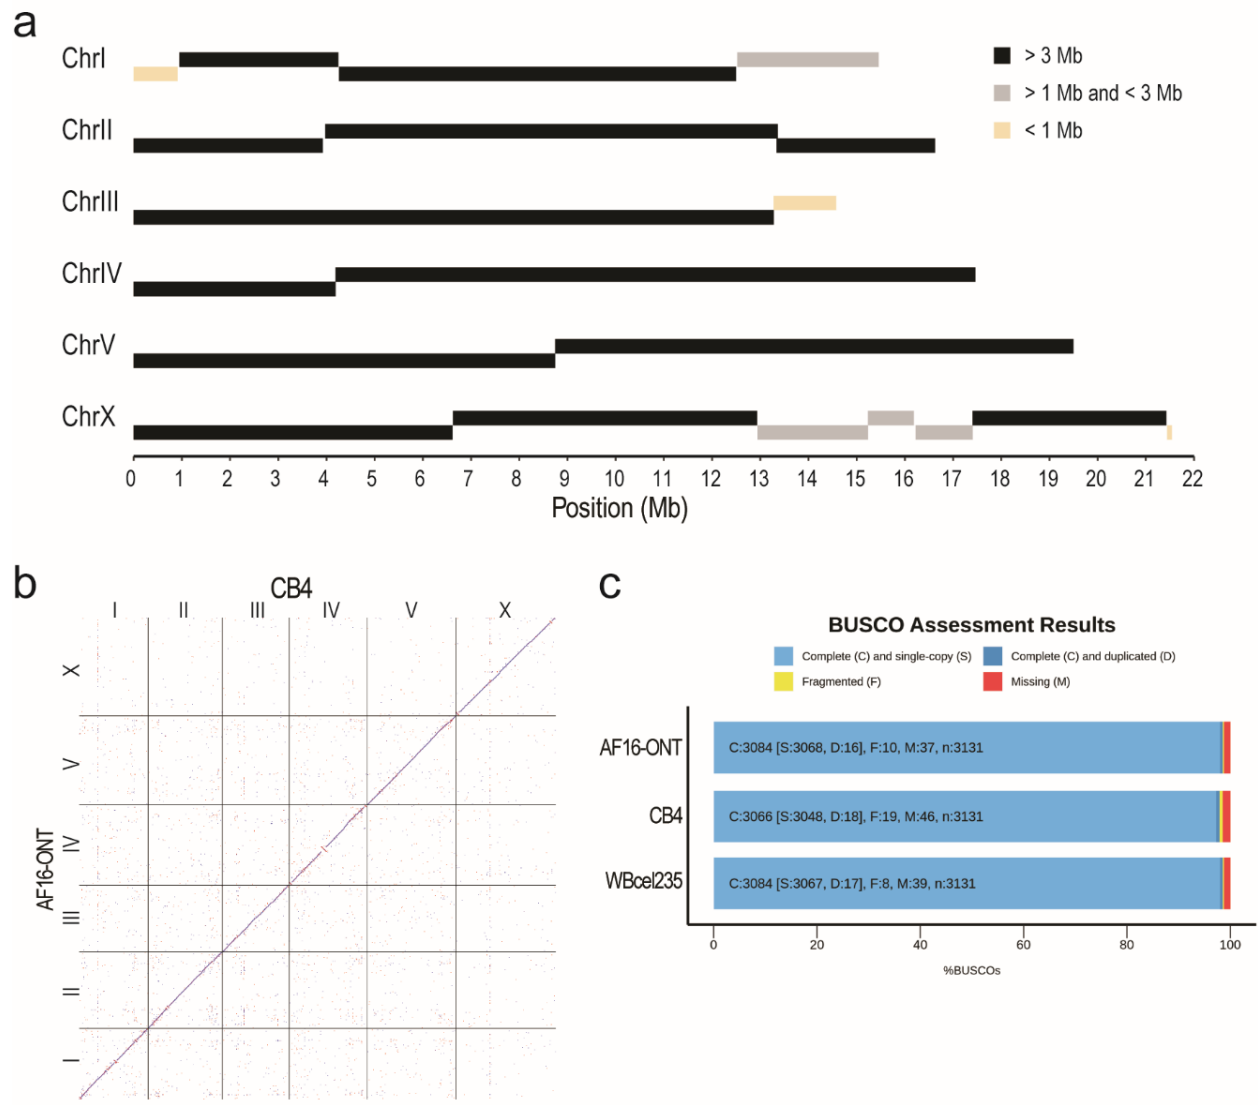

**Figure 4**



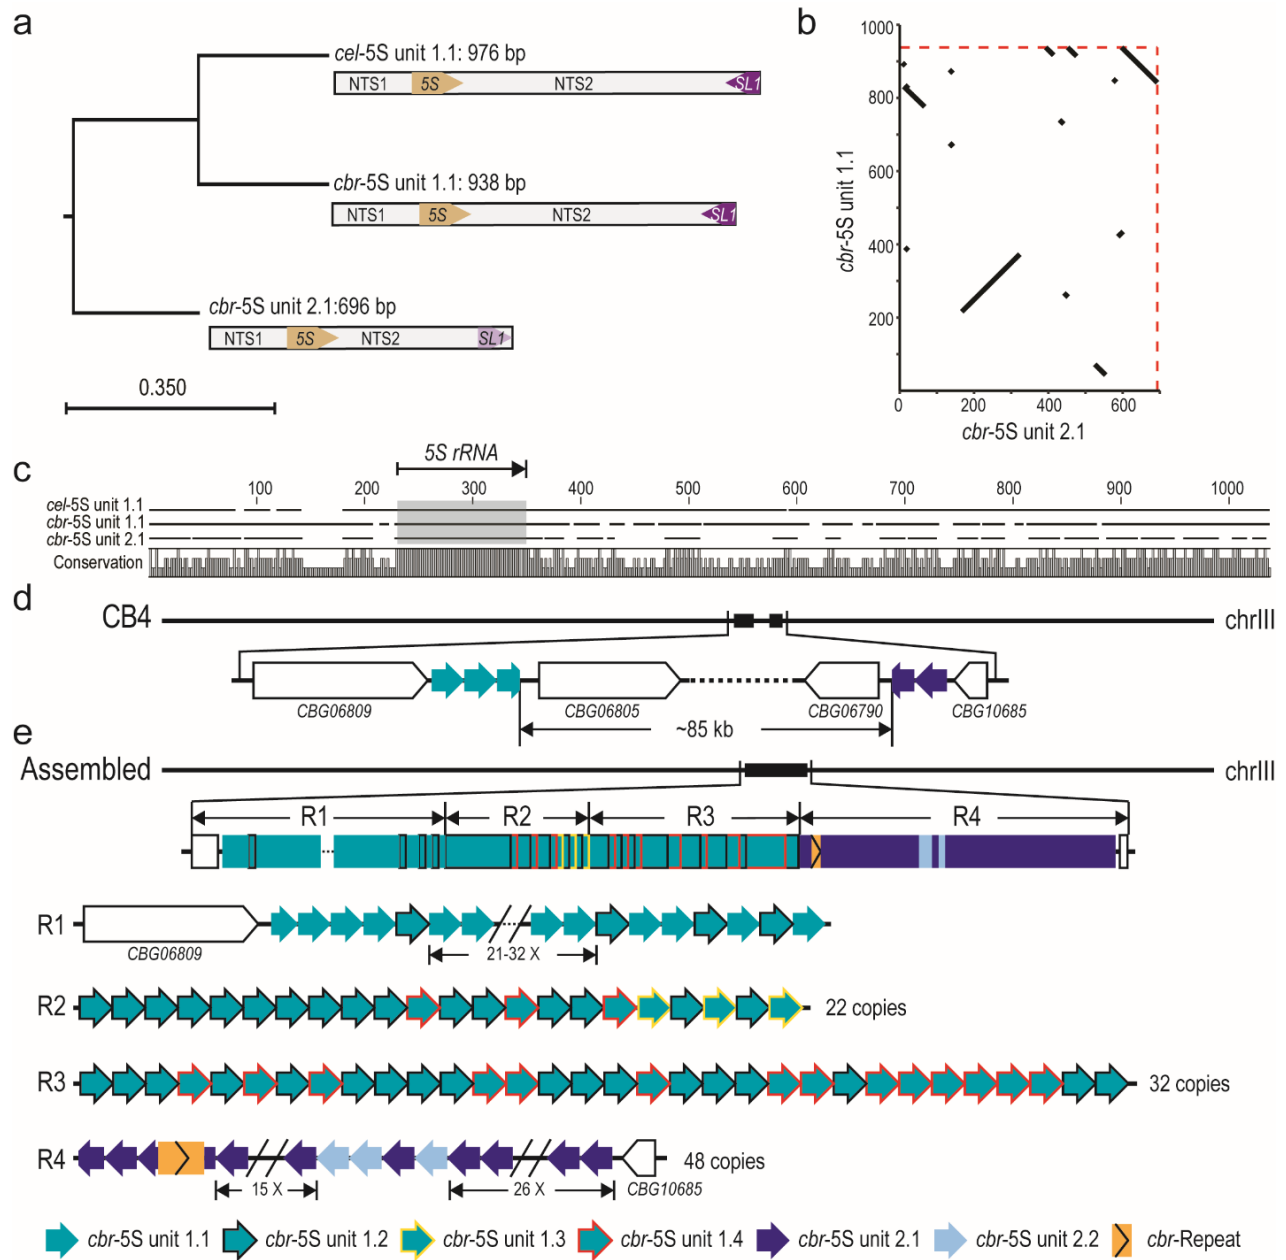

**Figure 5**

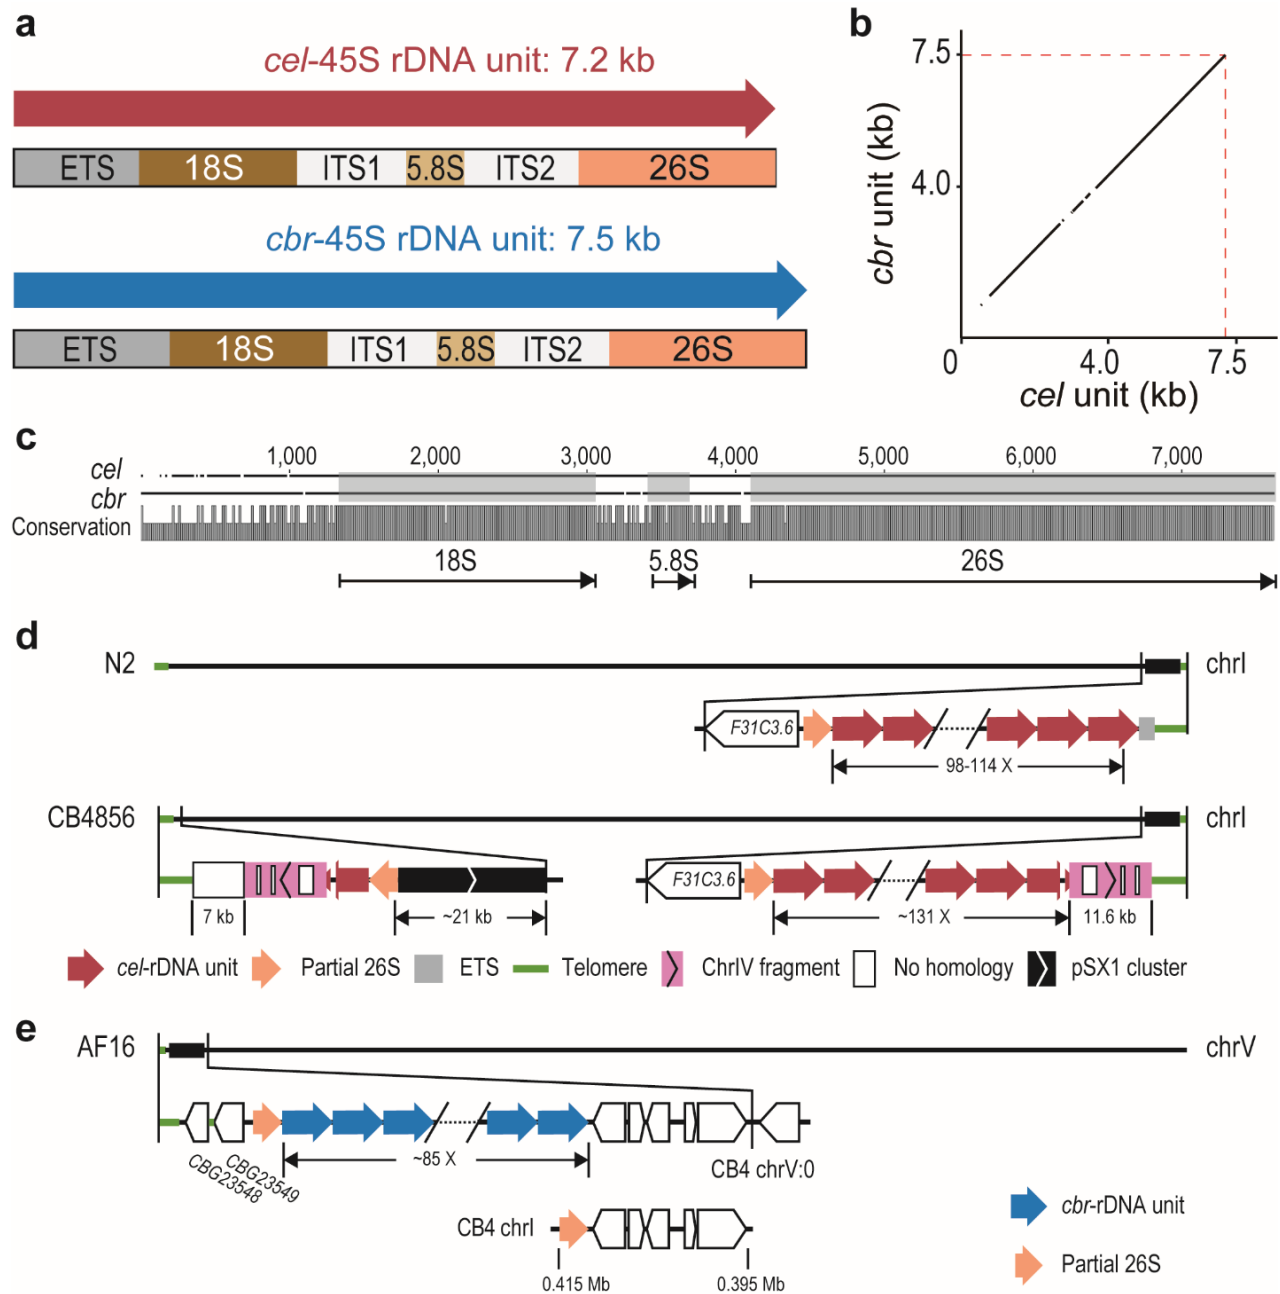

**Figure 6**

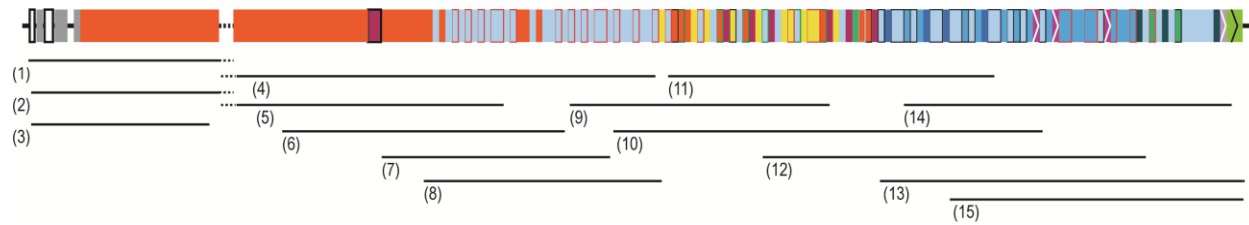

**Fig. S1 Illustration of tiling path method for reconstructing 5S rDNA cluster in *C. elegans***

**N2.** The composition of 5S rDNA units are shown as bars color-coded as in Figure 1. The unsolved region (dash line) contains tandemly repeated *cel-5S* unit 1.1. Lines under the 5S rDNA cluster indicate the alignment of ONT reads. Read name and length are listed below. (1) 816e3c91-e978-404c-ad0c-0feac8208ddd, 63,658 bp. (2) 57556aff-f79a-4de4-81cc-d77ce3fec273, 48,846 bp. (3) 19aaf089-cf0c-4b24-9fac-2d14971bc320, 29,729 bp. (4) 28651bf0-8be1-4564-a740-ad17d0f260bd, 62,870 bp. (5) 77d84d3f-61ab-4fb1-9e4a-0fa291e6735d, 46,434 bp. (6) 594d2e66-ce5e-4b91-9f9e-7d6d24d9fbaa, 42,977 bp. (7) 7414a2d3-acdd-4c72-8509-e029ec1d7d13, 34,568 bp. (8) 367d1386-8328-4329-9ba6-c162993d8ede, 35,021 bp. (9) 98b70228-6f3c-4e4b-ba71-b3631eea7acf, 38,624 bp. (10) 057d9497-6b73-4c82-9859-fd177a9930a2, 66,357 bp. (11) 9e96acd5-b022-4321-b922-bdbc7a33f7ab, 46,176 bp. (12) d42edfb5-7347-4c77-9d8c-23db3147a327, 50,719 bp. (13) 42938dc9-d10f-40cc-9558-cd6dade92882, 49,434 bp. (14) c40285fc-c214-402d-b2c6-29b3d629c3f6, 52,513 bp. (15) bb18b8be-a27d-4119-aa91-b4b310f8cb28, 54,031 bp.

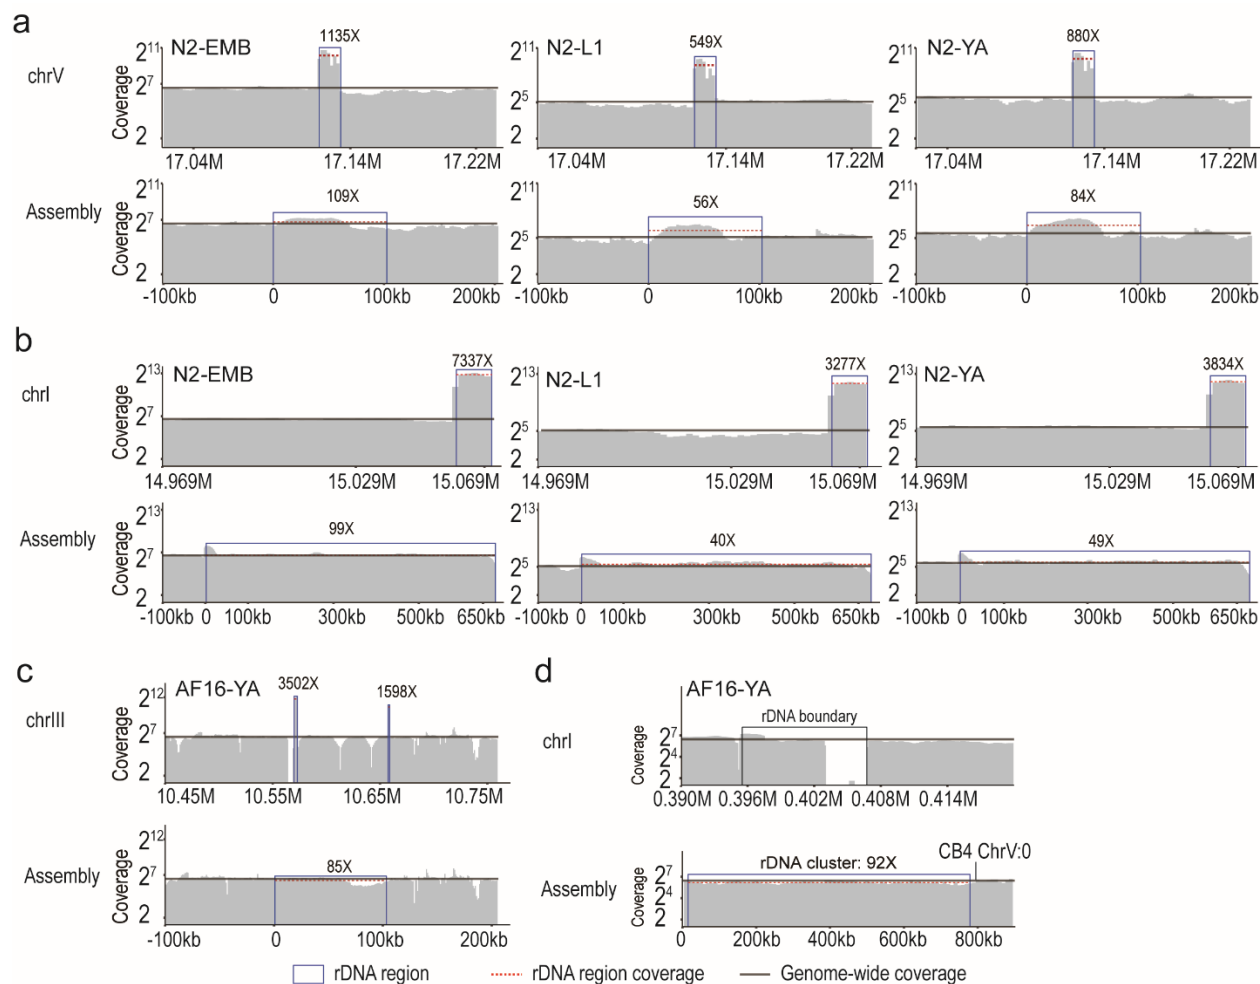

**Fig. S2 Coverage changes in rDNA clusters.** (a) The coverage changes between the *C. elegans* N2 reference chromosome V 5S rDNA cluster region and ONT reads assembled 5S rDNA cluster consensus. (b) The coverage changes between reference chromosome I 45S rDNA cluster region and ONT reads assembled 45S rDNA cluster consensus. (c) The coverage changes between the *C. briggsae* AF16 CB4 chromosome III 5S rDNA cluster region and the ONT reads assembled 5S rDNA cluster consensus. (d) The coverage of misassembled 45S rDNA cluster flanking sequences on CB4 chromosome I and the ONT reads assembled 45S rDNA cluster-containing region on chromosome V.

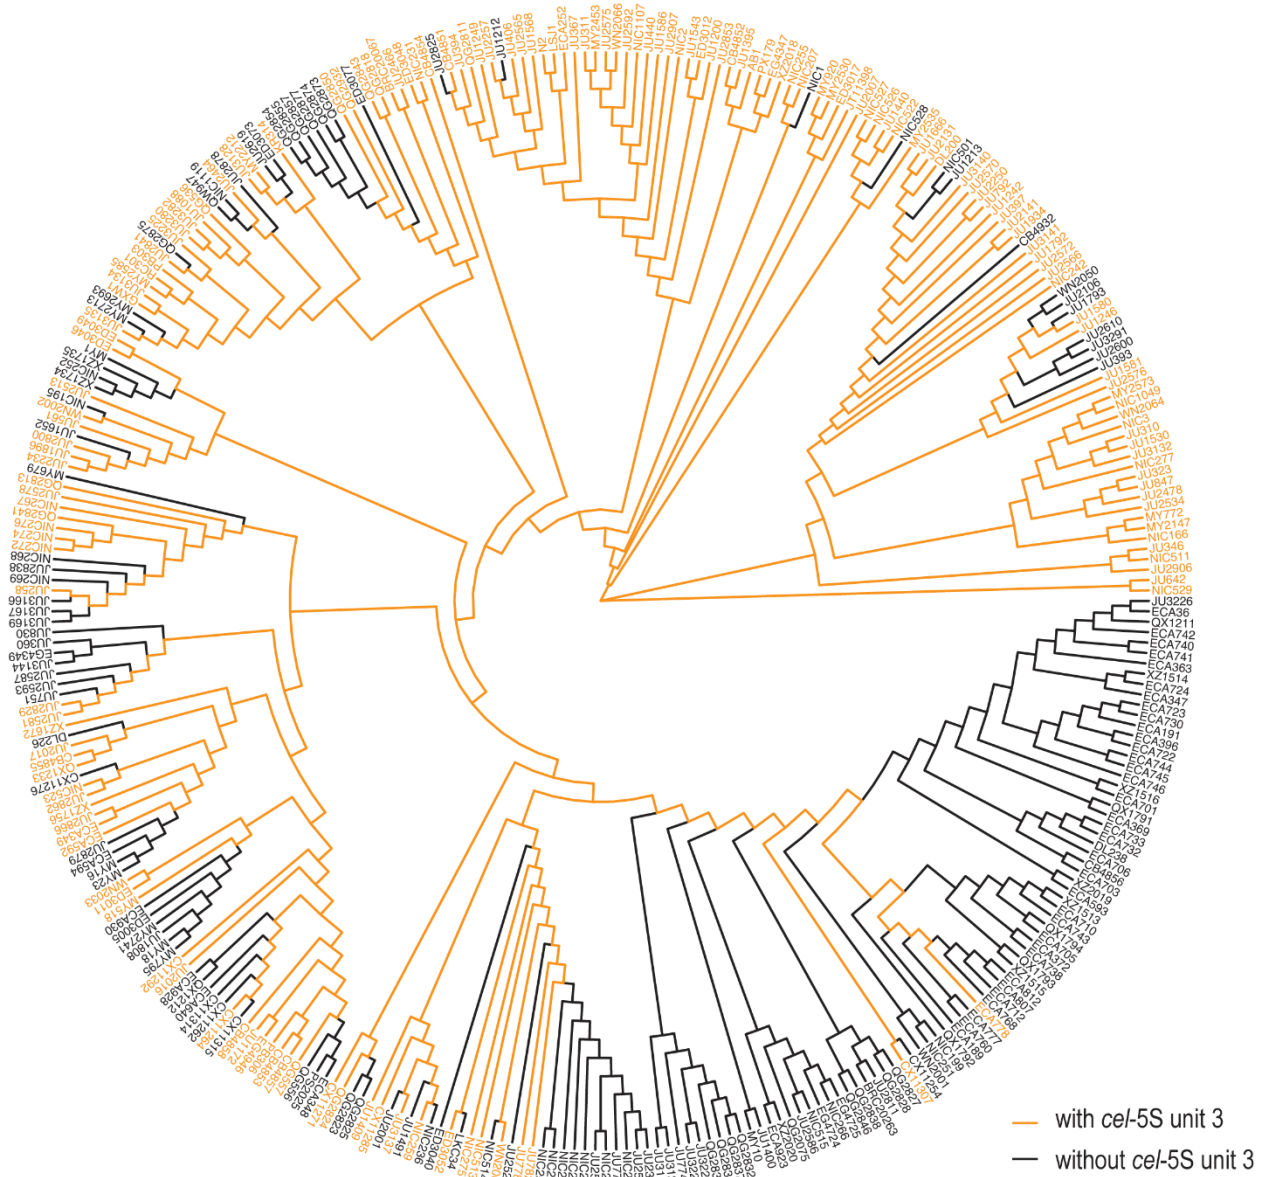

**Fig. S3 Presence of *cel-5S* unit 3 in the phylogenetic tree of 330 *C. elegans* wild-isolated strains.** Branches marked with black color indicate that the *cel-5S* unit 3 is absent from NGS reads. See Table S5 for a detailed proportion of *cel-5S* unit 3 unique junctional reads in each strain.

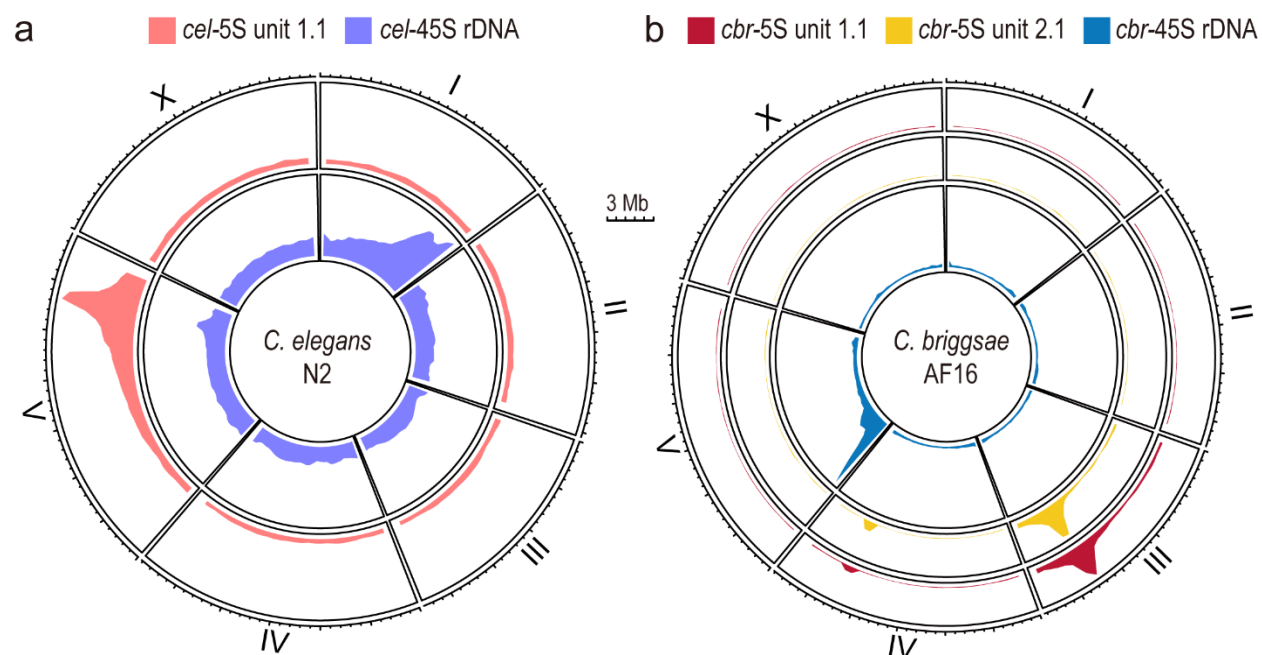

**Fig. S4 Hi-C interactions between rDNA clusters and chromosomes.** (a) The *C. elegans* N2 genomic linkage density between chromosomes and the 5S rDNA cluster (pink in the outer circle) and 45S rDNA cluster (purple in the inner cycle). (b) The *C. briggsae* AF16 genomic linkage density between chromosomes and pseudo-chromosomes of *cbr-5S* unit 1 (red in the outmost cycle), *cbr-5S* unit 2 (yellow in the middle cycle) and 45S rDNA (blue in the inner cycle).

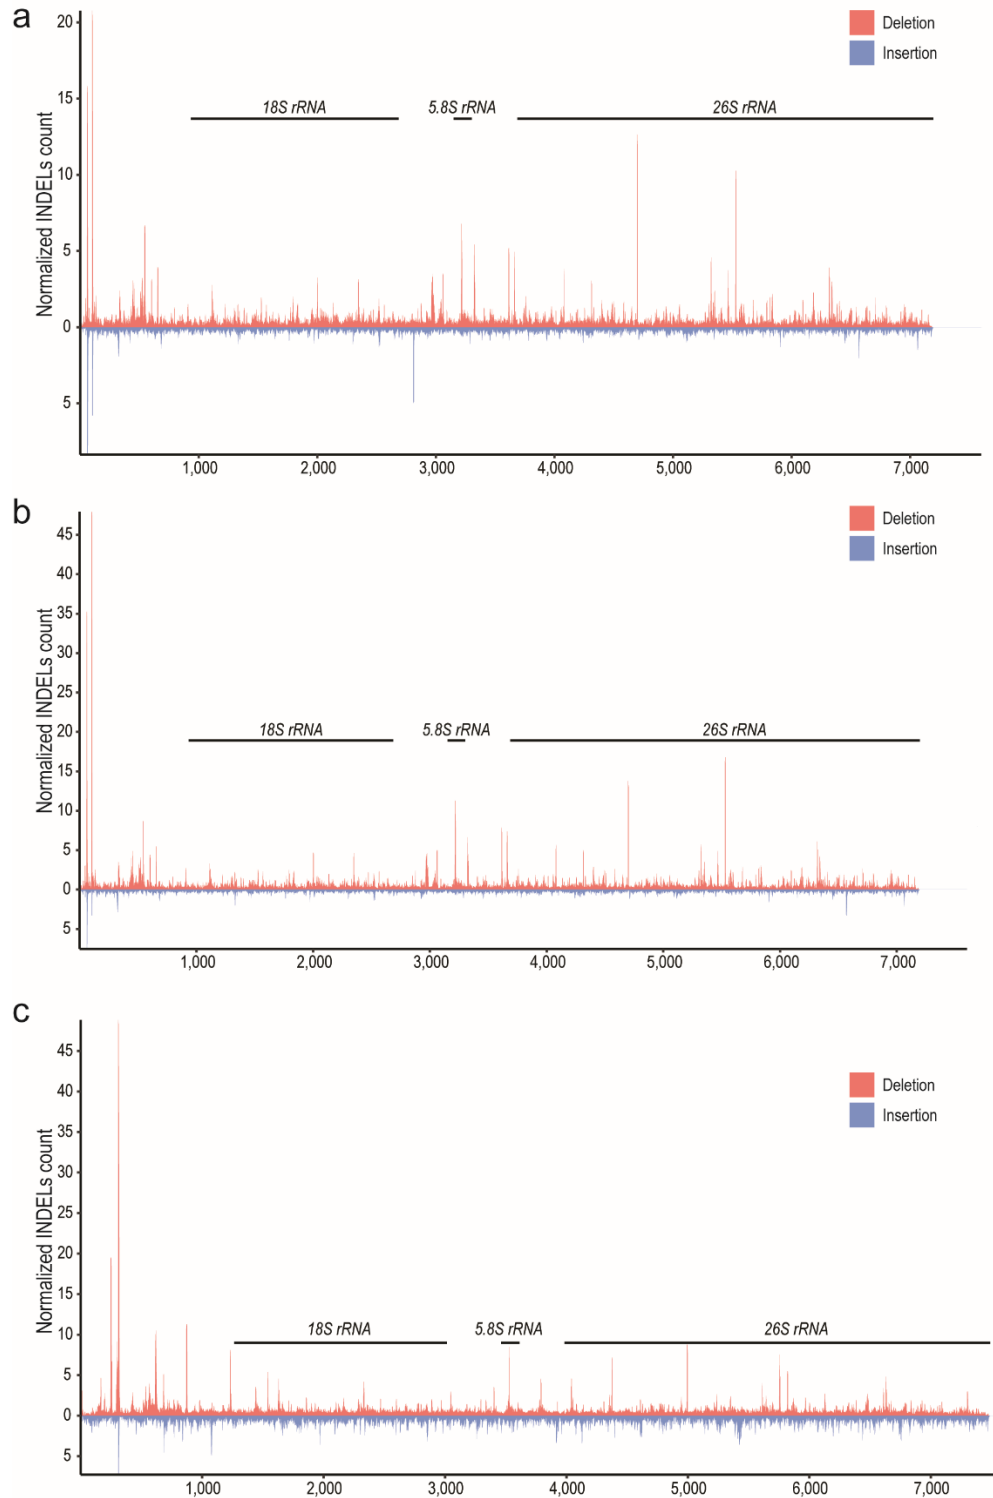

**Fig. S5 Large INDELs in 45S rDNA cluster of *C. elegans* and *C. briggsae*.** Histogram plots show the normalized INDELs count of ONT reads mapped to a single copy of 45S rDNA sequences in *C. elegans* N2 (a) and CB4856 (b), and *C. briggsae* AF16 (c) 45S rDNA clusters.

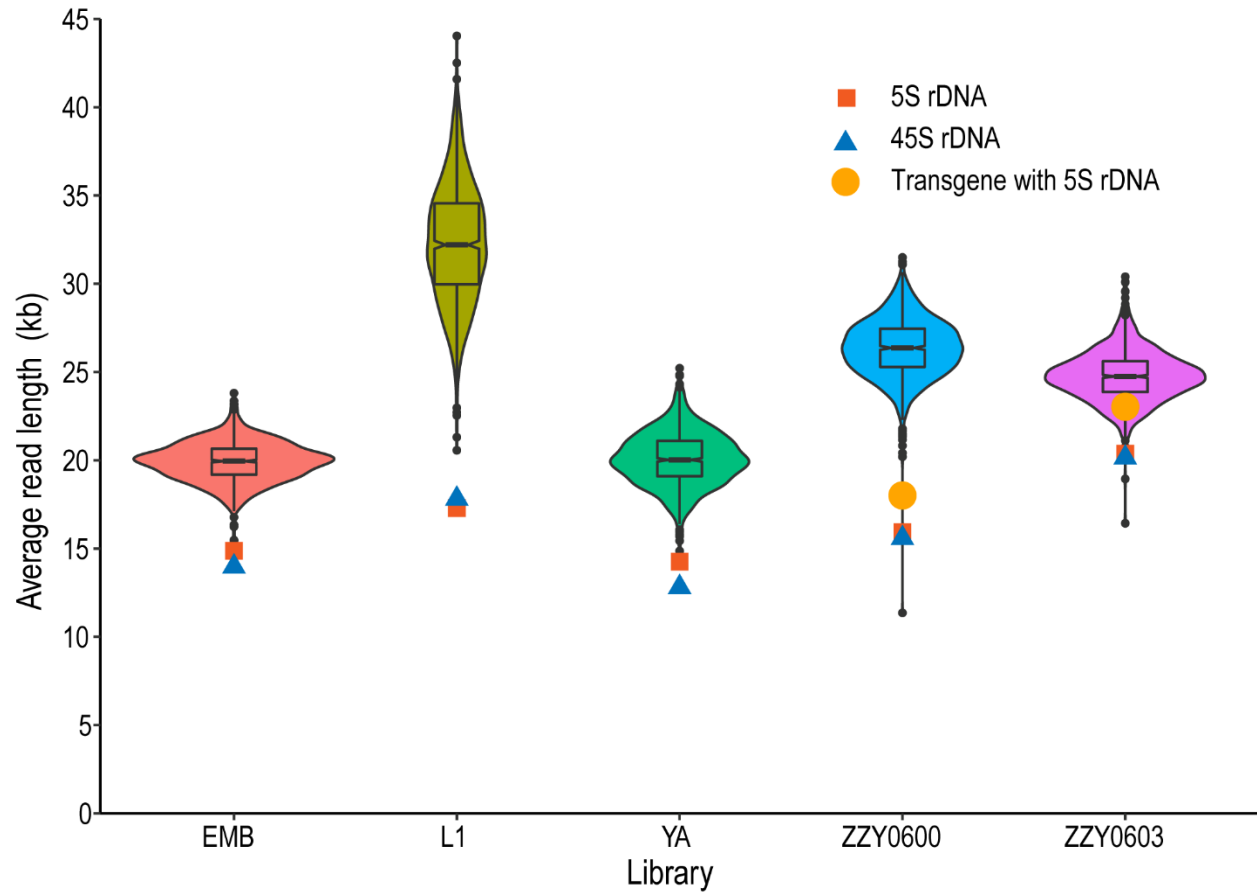

**Fig. S6 Smaller average read length in the rDNA clusters than in other genomic loci.** Distribution of average read length from 999 positions in genome-wide positions and two rDNA clusters. Average lengths of ONT reads derived from 5S, 45S rDNA cluster, and transgene with rDNA sequences are denoted with a red square, blue triangle, and dark yellow dot, respectively. Box-plot shows the average read length ranging from Q1 quartile (25 percentiles) to Q3 quartile (75 percentiles).



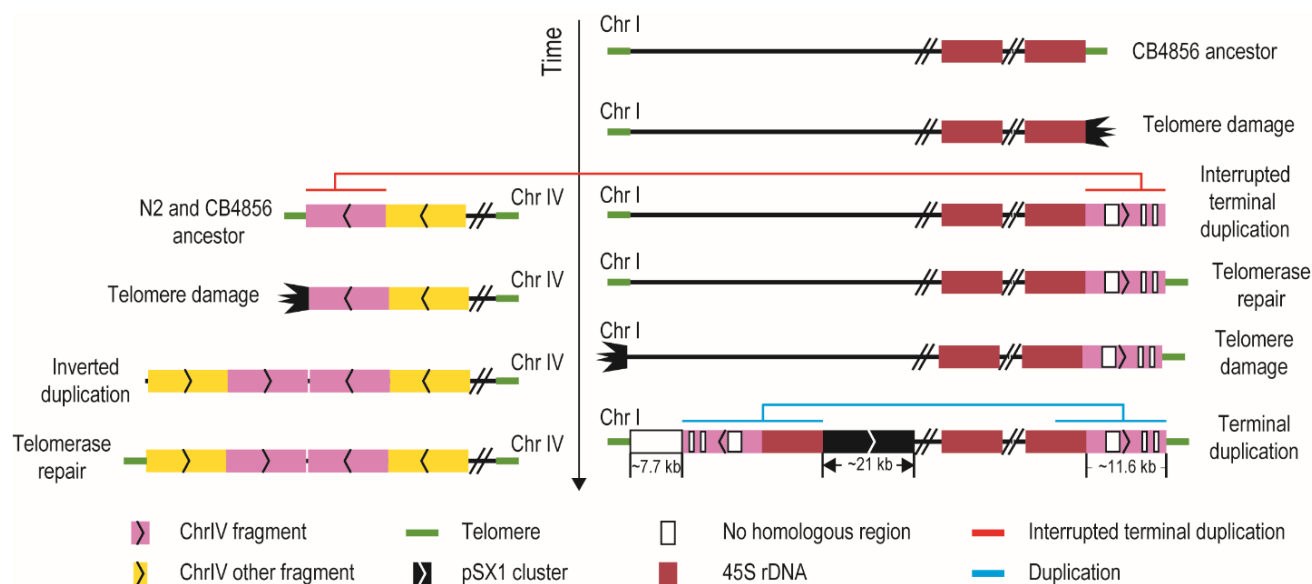

**Fig. S7 A terminal duplication model of chrIL, chrIR, and chrIVL ends in *C. elegans* CB4856 ancestor.** The CB4856 ancestor underwent telomere damage at chrIR end and sequential telomere-damage repair by interrupted terminal duplication from Chr IVL subtelomere and telomere lengthening. Afterward, the ancestor chrIVL underwent a telomere crisis and repaired by an inverted duplication with telomerase repairing. Then, the ancestor met telomere damage at chrIL end and sequential damage repair by the new chrIR terminal duplication including partial 45S rDNA. The chrIL pSX1 cluster containing 124 copies of full-length pSX1 (172 bp) and 5 partial-length copies is ~21 kb in length.

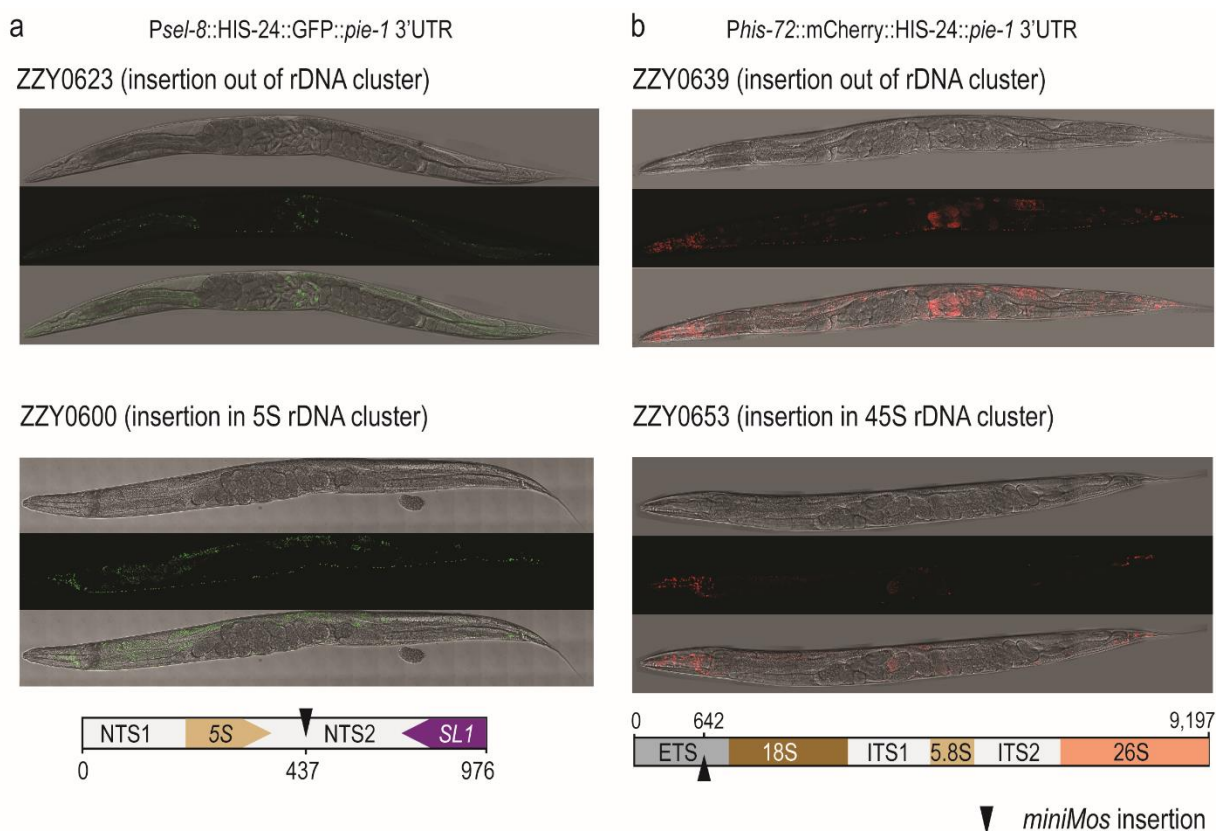

**Fig. S8 Altered expression pattern of transgenes in rDNA clusters.** (a) Comparison of the expression of transgene inserted inside and outside of 5S rDNA cluster: Outside: GFP expression is found in embryos with 350 or more cells, and head and tail cells and some of the neurons in adult animals in ZZY0623. Inside: GFP expression is found in the head and tail cells and neuron nucleuses in ZZY0600 adult worm. (b) Comparison of the expression of transgene inserted inside and outside of 45S rDNA cluster: Outside, mCherry expression is found in late-stage embryos, mitotic germline, and ubiquitously in ZZY0639 adult animals; Inside, mCherry expression is found in late-stage embryos and head and tail cells in ZZY0653 adult animals. The transgene cassette in ZZY0653 was inserted into ETS in the opposite direction to the unit.
